# Supplementary material for: Translational control of depression-like behavior via phosphorylation of eukaryotic translation initiation factor 4E
Source: PubMed Central journal article supplement (PMC6018502; doi:10.1038/s41467-018-04883-5), 2018-06-25

# Translational control of depression-like behavior via phosphorylation of eukaryotic translation initiation factor 4E

Argel Aguilar-Valles, Nabila Haji, Danilo De Gregorio, Edna Matta-Camacho, Mohammad J. Eslamizade, Jelena Popic, Vijendra Sharma, Ruifeng Cao, Christoph Rummel, Arnaud Tanti, Shane Wiebe, Nicolas Nunez, Stefano Comai, Robert Nadon, Giamal Luheshi, Naguib Mechawar, Gustavo Turecki, Jean-Claude Lacaille, Gabriella Gobbi and Nahum Sonenberg

## Supplementary Information

### Supplementary Figures

#### Supplementary Figure 1

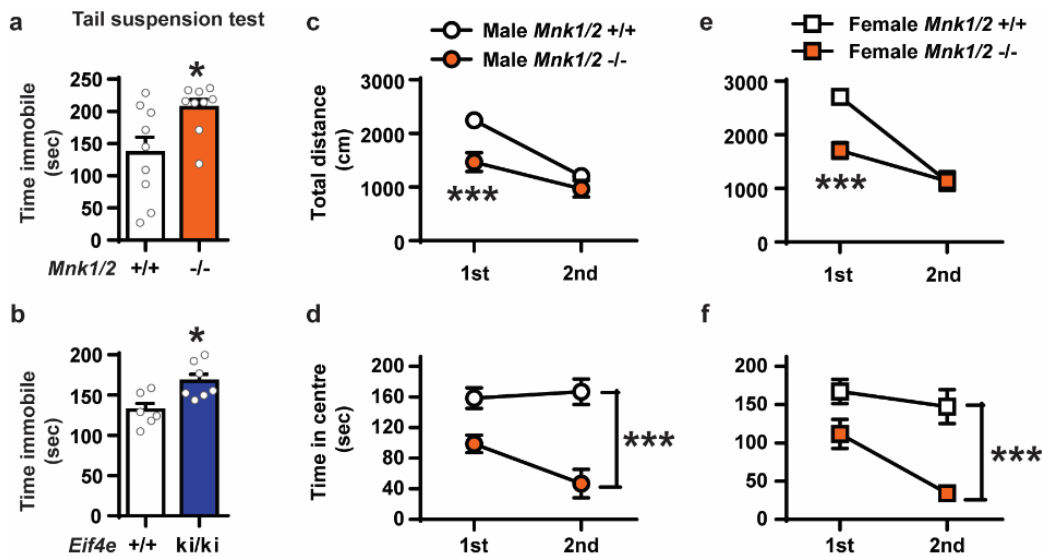

**Supplementary Figure 1. Additional measures of despair-like and anxiety behaviors in *Eif4e* ki/ki and *Mnk1/2* -/- mice.**

**a**, Tail suspension test (TST) was performed in male *Mnk1/2* -/- mice (n=9) and their wildtype littermates (n=9). **b**, TST was also performed in male *Eif4e* +/+ (n=6) and ki/ki mice (n=7). **c**, Male *Mnk1/2* +/+ and -/- mice locomotor activity in an open field (OF) was measured in two sessions 7 days apart from each other (data from 1<sup>st</sup> session is also presented in Fig. 1i) (n=13 *Mnk1/2* +/+, n=8 *Mnk1/2* -/-). **d**, Time of exploration of the OF center was recorded at the same time in the male mice (data from 1<sup>st</sup> session is also presented in Fig. 1g). **e**, Locomotor activity in the OF for female wildtype and *Mnk1/2* -/- mice was measured in two sessions 7 days apart (data from the 1<sup>st</sup> session is also presented in Fig. 1i) (n=7 *Mnk1/2* +/+, n=14 *Mnk1/2* -/-). **f**, Time of exploration of the OF center was recorded at the same time (data from 1<sup>st</sup> session is also presented in Fig. 1g). \* p<0.05, \*\*\* p<0.001 vs. wildtype mice (see Supplementary Table 2 for detailed results of statistical tests).

## Supplementary Figure 2

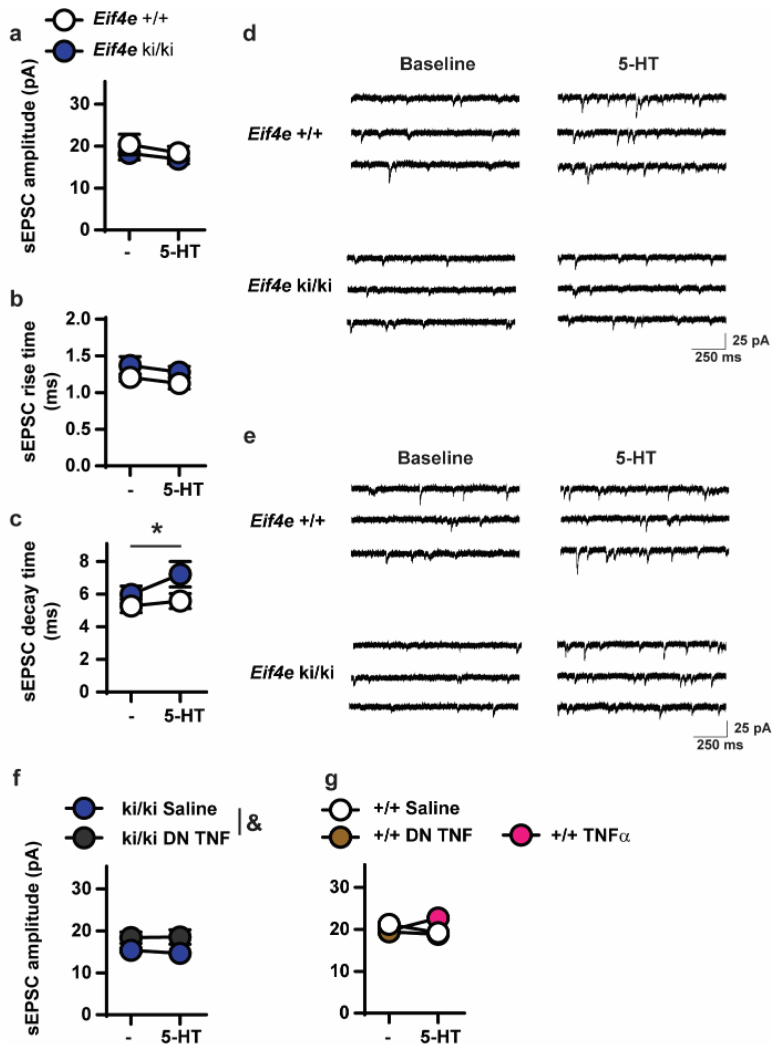

**Supplementary Figure 2. Amplitude of spontaneous excitatory post-synaptic currents (sEPSCs) in layer V pyramidal neurons of mPFC remained unaltered across different experiments in *Eif4e* +/+ and ki/ki mice.**

**a**, sEPSC amplitude in mPFC pyramidal neurons of *Eif4e* +/+ and ki/ki mice (from recordings in Fig. 1b, left panel). Synaptic currents were recorded before and after 5-HT (20  $\mu$ M) bath application. Representative traces are shown in Figs. 1a (n). **b**, sEPSC rise time for recordings in **a** and Fig. 1b (left panel). **c**, sEPSC decay time for recordings in **a** and Fig. 1b (left panel). **d,e**, Representative whole-cell recordings of sEPSCs from layer V pyramidal neurons of mPFC of wildtype and *Eif4e* ki/ki mice. Synaptic currents were recorded before (baseline) and after 50  $\mu$ M (**d**) or 100  $\mu$ M (**e**) 5-HT treatment. Frequency data is presented in Fig. 1b (middle and right panel). **f**, Amplitude of sEPSCs of pyramidal neurons from *Eif4e* ki/ki mice in slices treated with either saline or DN TNF (200 ng/ml) and recorded pre- and post-5-HT (20  $\mu$ M) application. Representative traces are shown in Fig. 3g. **g**, Amplitude of sEPSCs from wildtype mice in slices treated with either saline, DN TNF (200 ng/ml) or mouse recombinant TNF $\alpha$  (10 ng/ml). Representative traces are shown in Fig. 3h. \*,  $p < 0.05$  5-HT vs baseline (see Supplementary Table 2 for detailed results of statistical tests).

### Supplementary Figure 3

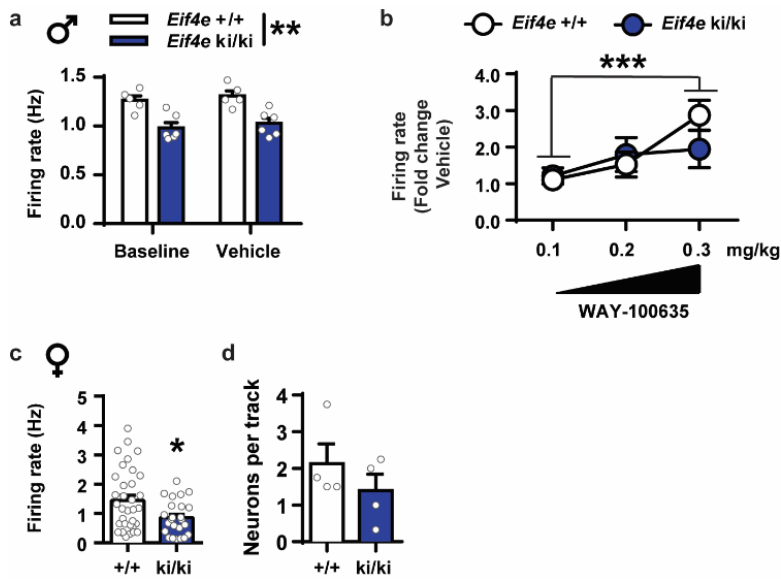

**Supplementary Figure 3. Normal response to 5-HT<sub>1A</sub> autoreceptor inhibition and decrease 5-HT firing in female *Eif4e* ki/ki mice.**

**a**, Firing rate of DR neurons in male wildtype and *Eif4e* ki/ki mice without treatment (baseline) or injected with vehicle (saline) ( $n=5$  *Eif4e* +/+,  $n=6$  *Eif4e* ki/ki; 1 recording per mouse). **b**, Firing rate of DR neurons in male wildtype and *Eif4e* ki/ki mice, following treatment with increasing doses of WAY-100635 (IP, 0.1-0.3 mg/kg), a 5HT<sub>1A</sub> antagonist. Data is expressed as change from vehicle condition depicted in panel a. **c**, 5-HT neuronal firing rate in female wildtype and *Eif4e* ki/ki mice. **d**, Number of 5-HT neurons per descent in the DR of female wildtype and *Eif4e* ki/ki mice. \*,  $p<0.05$ , \*\*  $p<0.01$ , \*\*\*  $p<0.001$  vs wildtype (see Supplementary Table 2 for detailed results of statistical tests).

### Supplementary Figure 4

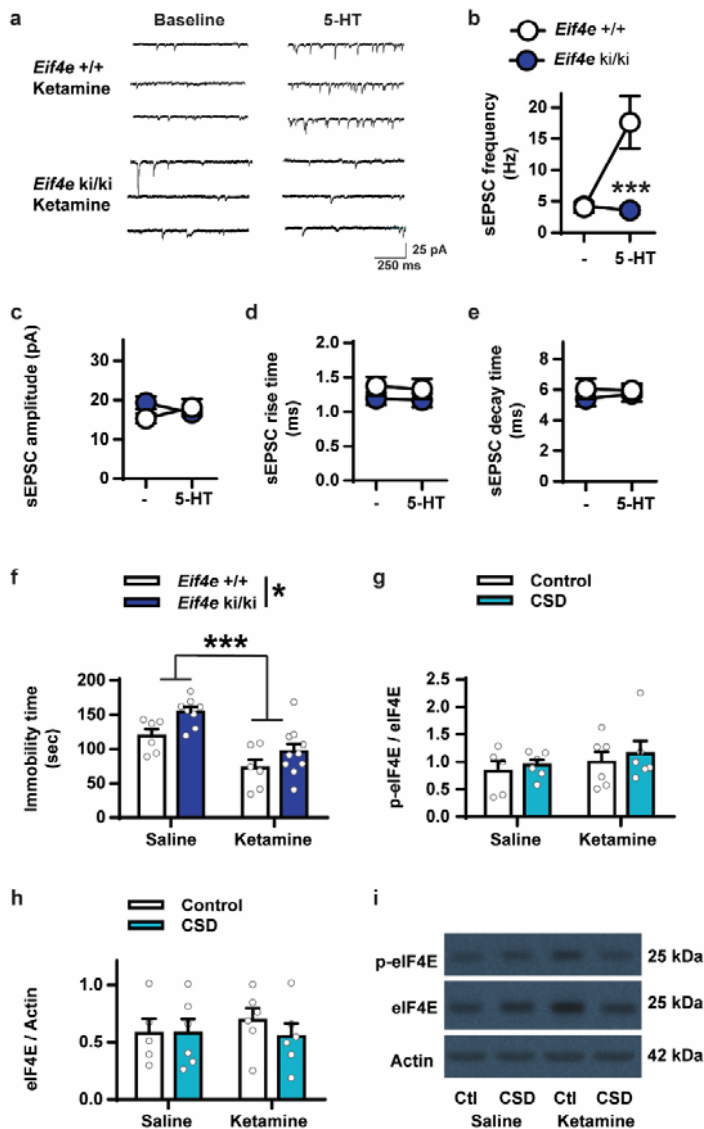

### Supplementary Figure 4. Normal behavioral anti-depressant effect of ketamine in *Eif4e* *ki/ki* mice despite impaired serotonergic neurotransmission.

**a**, Representative sEPSCs following ketamine treatment (10 mg/kg, 24 h prior to recording) in *Eif4e* *+/+* and *ki/ki* mice. **b**, Frequency of sEPSC in ketamine-treated wildtype or *Eif4e* *ki/ki* mice before and after 5-HT (20  $\mu$ M) treatment (n=8 cells from 4 *Eif4e* *+/+*; n=13 cells from 5 *Eif4e* *ki/ki*). **c**, sEPSC amplitude in mPFC pyramidal neurons of *Eif4e* *+/+* and *ki/ki* mice treated with ketamine (10 mg/kg) 24 h before recording. **d**, sEPSC rise time from recordings in panels a-c. **e**, sEPSC decay time of recordings in panels a-c. **f**, Immobility time in the FST 1 h after saline or ketamine treatment (IP, 10 mg/kg) in wildtype (Saline n=6; Ketamine n=6) or *Eif4e* *ki/ki* (Saline n=8; Ketamine n=10) mice. **g**, Phosphorylation levels of eIF4E in the mPFC/HPC of wildtype mice treated with saline or ketamine (1 h, IP, 10 mg/kg). Mice were either naïve or subjected to a chronic social defeat (CSD) protocol to induce depression-like phenotypes (n=5-6/group). **h**, Total levels of eIF4E in samples from g. **i**, Representative Western blots from mice treated with saline or ketamine. \* p < 0.05, \*\*\* p < 0.001 vs. *Eif4e* *+/+* or saline-treated groups.

Supplementary Figure 5

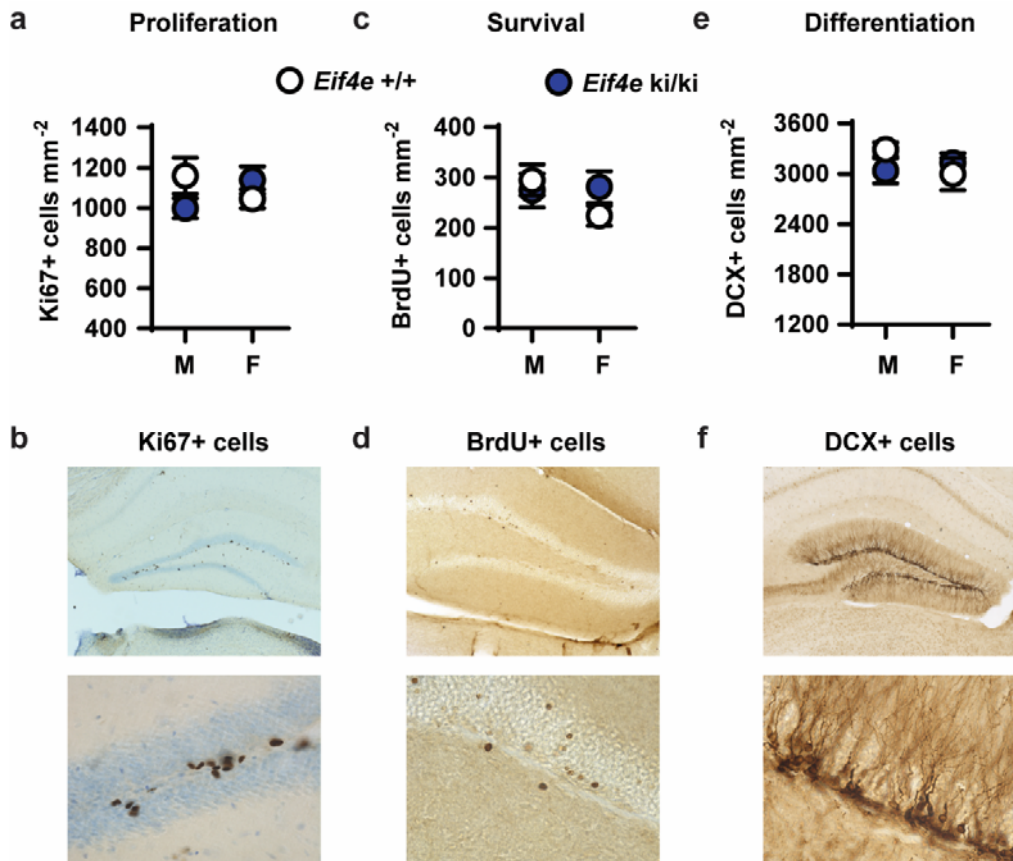

**Supplementary Figure 5. Normal adult hippocampal neurogenesis in male and female *Eif4e* ki/ki mice.**

**a**, Cell proliferation in adult dentate gyrus was determined by quantification of Ki67 positive cells in male and female wildtype and *Eif4e* ki/ki mice. **b**, Representative staining image for Ki67 + cells in the adult dentate gyrus. **c**, Survival of newborn cells in the adult dentate gyrus of male and female *Eif4e* +/+ and ki/ki mice was estimated by quantifying bromodeoxyuridine (BrdU) positive cells, 4 weeks after the last BrdU administration (IP). **d**, Representative staining image for BrdU + cells in the adult dentate gyrus. **e**, Differentiation of newborn cells into neurons in the adult dentate gyrus of male and female wildtype and *Eif4e* ki/ki mice was determined by quantification of doublecortin (DCX) positive cells. **f**, Representative staining of DCX positive cells in the adult dentate gyrus (see Supplementary Table 2 for group sizes and detailed results of statistical tests).

## Supplementary Figure 6

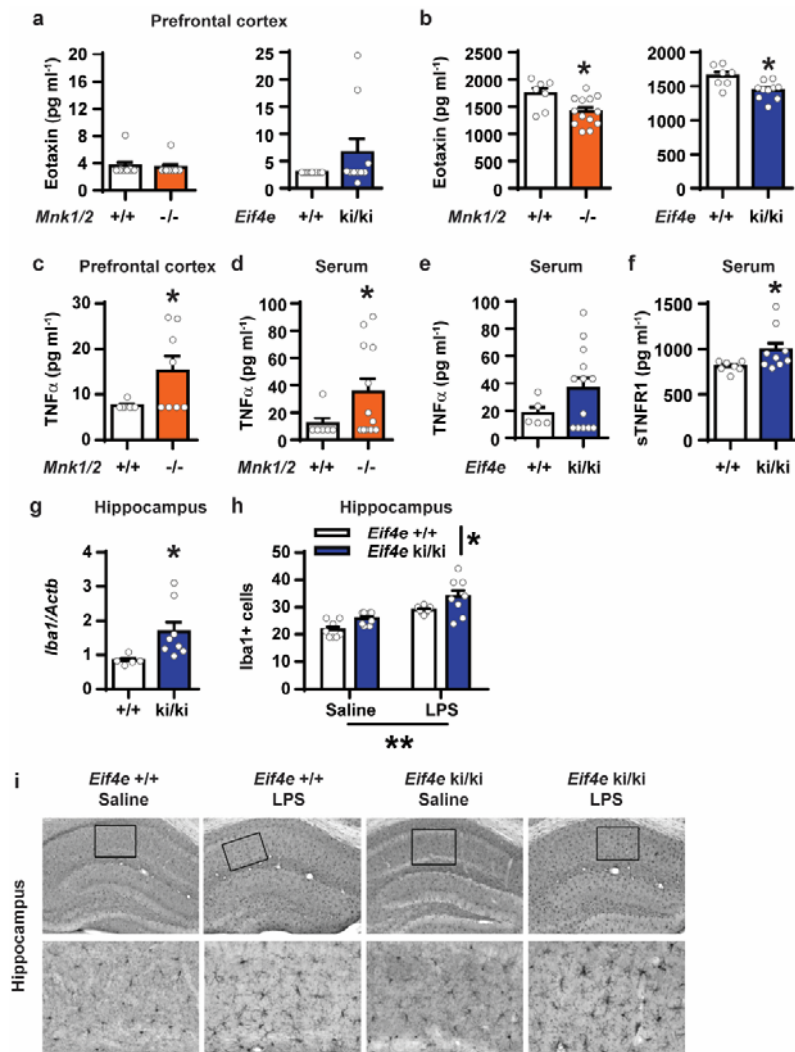

**Supplementary Figure 6. Elevated TNF $\alpha$  and signs of neuroinflammation in *Mnk1/2* -/- and *Eif4e* ki/ki mice.**

**a**, Eotaxin levels in the PFC of *Mnk1/2* -/- and *Eif4e* ki/ki mice and their respective littermate control mice (n=9 *Mnk1/2* +/+, n=9 *Mnk1/2* -/-; n=11 *Eif4e* +/+; n= 10 *Eif4e* ki/ki). **b**, Eotaxin was also measured in the peripheral blood of *Mnk1/2* -/- and *Eif4e* ki/ki mice (n=7 *Mnk1/2* +/+, n=13 *Mnk1/2* -/-; n=7 *Eif4e* +/+; n=10 *Eif4e* ki/ki). **c**, TNF $\alpha$  levels in the PFC of *Mnk1/2* -/- and wildtype mice (n=7 *Mnk1/2* +/+, n=8 *Mnk1/2* -/-). **d**, TNF $\alpha$  levels in the peripheral blood of *Mnk1/2* -/- and wildtype mice (n=6 *Mnk1/2* +/+, n=12 *Mnk1/2* -/-). **e**, TNF $\alpha$  levels in the peripheral blood of *Eif4e* ki/ki and wildtype mice (n=5 *Eif4e* +/+; n=13 *Eif4e* ki/ki). **f**, Soluble TNF $\alpha$  receptor 1 (sTNFR1) levels in the circulation of *Eif4e* ki/ki and wildtype mice (n=7 *Eif4e* +/+; n=9 *Eif4e* ki/ki). **g**, Steady-state mRNA levels of the microglial activation marker Iba1 (*Aif1*) in the hippocampus of wildtype and *Eif4e* ki/ki mice (n=5 *Eif4e* +/+; n=8 *Eif4e* ki/ki). **h**, Number of Iba1 positive cells per 0.01 mm<sup>2</sup> of hippocampus from wildtype and *Eif4e* ki/ki mice treated with saline or LPS (IP, 2.5 mg/kg, IP) 48 h before tissue collection (n=4/group). **h**, Representative images of immunostaining for Iba1 in the hippocampus of wildtype or *Eif4e* ki/ki mice. \* p<0.05, \*\*p<0.01 vs wildtype (see Supplementary Table 2 for detailed results of statistical tests).

**Supplementary Figure 7**

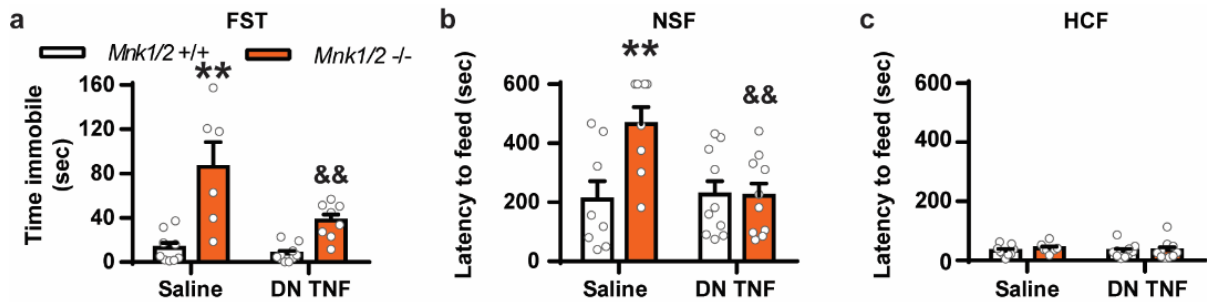

**Supplementary Figure 7. Inhibition of TNF $\alpha$  reverses depression-like behavior in *Mnk1/2* *-/-* mice.**

**a**, Effect of chronic administration of saline or dominant negative TNF (DN TNF, ICV) in wildtype and *Mnk1/2* *-/-* mice in the FST (n=9 *Mnk1/2* *+/+* Saline, n=10 *Mnk1/2* *+/+* DN TNF, n=6 *Mnk1/2* *-/-* Saline, n=8 *Mnk1/2* *-/-* DN TNF). **b**, These mice were also evaluated in the novelty suppressed feeding (NSF) task (n=8 *Mnk1/2* *+/+* Saline, n=10 *Mnk1/2* *+/+* DN TNF, n=8 *Mnk1/2* *-/-* Saline, n=10 *Mnk1/2* *-/-* DN TNF). **c**, Home-cage feeding (HCF) was also determined in wildtype and *Mnk1/2* *-/-* mice. \*\* p<0.01 vs. wildtype; && p<0.01 vs. *Mnk1/2* *-/-* treated with saline (see Supplementary Table 2 for detailed results of statistical tests).

Supplementary Figure 8

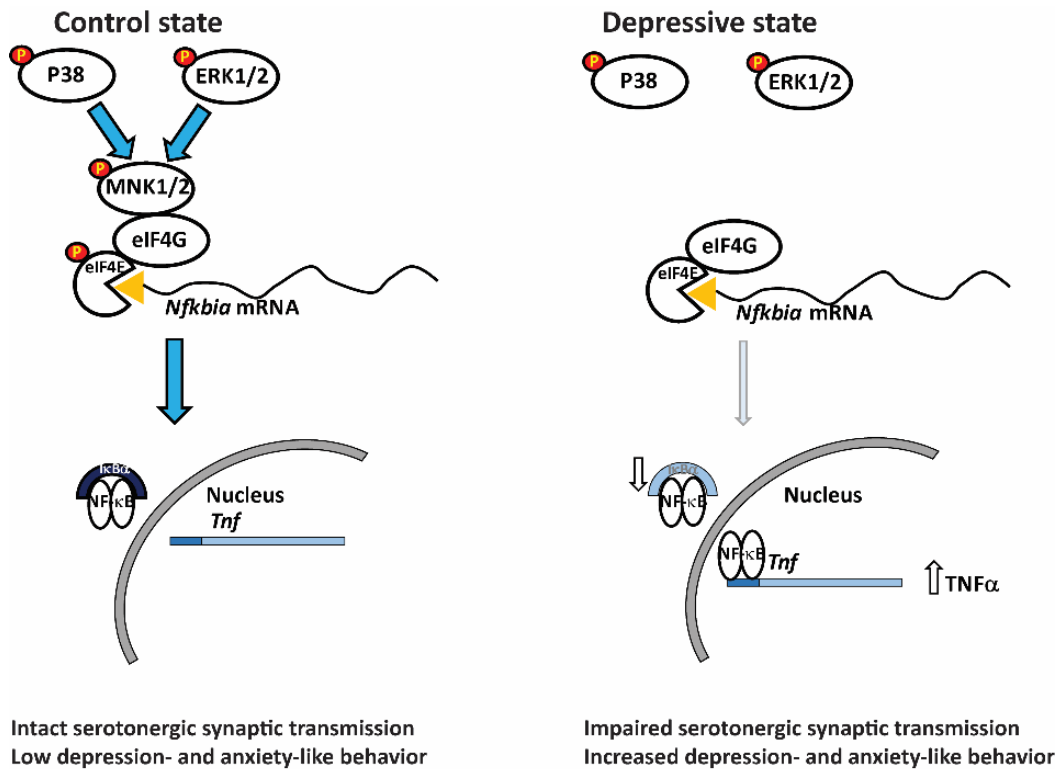

**Supplementary Figure 8. Contribution of the eIF4E phosphorylation pathways to depression pathophysiology.**

In a control state, eIF4E phosphorylation stimulates *Nfkb1a* translation, which contributes to the baseline repression of the NF-κB complexes and thus keeps the levels of transcription of *Tnf* inhibited. In the absence of Mnk1/2 or by mutating the unique phosphorylation site in eIF4E, translation of *Nfkb1a* is decreased, leading to increased activity of the NF-κB complex and increased levels of *Tnf* translation. Increased TNFα produces serotonergic dysfunction and depression- and anxiety-like behaviors.



## Supplementary Tables

**Supplementary Table 1. Prefrontal cortex levels of cytokines**

| Cytokine    | <i>Mnk1/2</i> +/+<br>n=9 | <i>Mnk1/2</i> -/-<br>n=9 | <i>Eif4e</i> +/+<br>n=8 | <i>Eif4e</i> ki/ki<br>n=8 |
|-------------|--------------------------|--------------------------|-------------------------|---------------------------|
| IL-1a       | 100 ± 8.36               | 88.92 ± 3.34             | 100 ± 6.39              | 114.84 ± 4.89             |
| IL-1b       | 100 ± 3.43               | 96.53 ± 3.09             | 100 ± 5.46              | 110.20 ± 3.16             |
| IL-2        | 100 ± 12.75              | 78.50 ± 7.60             | 100 ± 14.27             | 110.20 ± 8.88             |
| IL-5        | 100 ± 6.90               | 89.47 ± 7.59             | 100 ± 4.38              | 104.77 ± 5.32             |
| IL-6        | 100 ± 3.16               | 102.13 ± 14.77           | 100 ± 8.77              | 102.74 ± 9.16             |
| IL-9        | 100 ± 15.54              | 131.13 ± 13.03           | 100 ± 15.81             | 102.61 ± 14.60            |
| IL-10       | 100 ± 6.83               | 98.65 ± 4.75             | 100 ± 7.88              | 99.04 ± 6.83              |
| IL-12 (p40) | 100 ± 5.55               | 121.03 ± 15.18           | 100 ± 21.94             | 93.06 ± 5.95              |
| IL-12 (p70) | 100 ± 10.13              | 119.94 ± 8.58            | 100 ± 16.34             | 113.85 ± 12.35            |
| IL-13       | 100 ± 5.32               | 90.26 ± 3.69             | 100 ± 7.46              | 116.29 ± 10.79            |
| IL-17       | 100 ± 6.32               | 70.31 ± 3.11             | 100 ± 8.94              | 95.25 ± 10.02             |
| Eotaxin     | 100 ± 10.63              | 124.09 ± 7.58            | 100 ± 13.76             | 127.90 ± 7.49             |
| GM-CSF      | 100 ± 7.03               | 101.87 ± 3.16            | 100 ± 7.16              | 106.70 ± 4.79             |
| IFN-g       | 100 ± 9.17               | 116.14 ± 9.23            | 100 ± 13.47             | 109.05 ± 7.58             |
| KC          | 100 ± 3.70               | 96.13 ± 4.98             | 100 ± 9.35              | 102.50 ± 4.69             |
| MCP-1       | 100 ± 5.14               | 106.98 ± 4.98            | 100 ± 7.37              | 104.71 ± 4.51             |
| MIP-1a      | 100 ± 17.84              | 84.60 ± 7.13             | 100 ± 12.91             | 93.49 ± 4.68              |
| MIP-1b      | 100 ± 3.25               | 91.49 ± 2.76             | 100 ± 5.67              | 100.36 ± 3.43             |
| RANTES      | 100 ± 8.04               | 125.25 ± 38.97           | 100 ± 26.94             | 73.38 ± 6.94              |
| TNFa        | 100 ± 20.36              | 1783.62 ± 885.43         | 100 ± 31.88             | 460.70 ± 308.25           |
| IL-3        | n.d.                     | n.d.                     | n.d.                    | n.d.                      |
| IL-4        | n.d.                     | n.d.                     | n.d.                    | n.d.                      |
| G-CSF       | n.d.                     | n.d.                     | n.d.                    | n.d.                      |

Data is expressed as % of respective wildtype group. Data is average +/- S.E.M. n.d.: non detectable

**Supplementary Table 2. Statistical analyses**

| Figure | Panel | Test                                  | Group size                                        | Statistic                                              | P value | Pair-wise comparisons | Statistic |
|--------|-------|---------------------------------------|---------------------------------------------------|--------------------------------------------------------|---------|-----------------------|-----------|
| Fig. 1 | a     | 2-way ANOVA<br>(Gender X<br>Genotype) | Males:<br>Mnk1/2 +/+ = 8<br>Mnk1/2 -/- = 9        | Main effect of<br>genotype: F(1, 25) =<br>13.37        | 0.0012  | N/A                   |           |
|        |       |                                       | Females:<br>Mnk1/2 +/+ = 3<br>Mnk1/2 -/- = 9      | Main effect of<br>gender: F(1, 25) =<br>0.3217         | 0.5757  | N/A                   |           |
|        |       |                                       |                                                   | Gender X Genotype<br>Interaction: F(1, 25)<br>= 1.509  | 0.2307  | N/A                   |           |
|        | b     | 2-way ANOVA<br>(Gender X<br>Genotype) | Males:<br>Eif4e +/+ = 19<br>Eif4e ki/ki = 19      | Main effect of<br>genotype: F(1, 49) =<br>11.85        | 0.0012  | N/A                   |           |
|        |       |                                       | Females:<br>Eif4e +/+ = 7<br>Eif4e ki/ki = 8      | Main effect of<br>gender: F(1, 49) =<br>1.690          | 0.1996  | N/A                   |           |
|        |       |                                       |                                                   | Gender X Genotype<br>Interaction: F(1, 49)<br>= 0.2206 | 0.6407  | N/A                   |           |
|        | c     | 2-way ANOVA<br>(Gender X<br>Genotype) | Males:<br>Mnk1/2 +/+ = 8<br>Mnk1/2 -/- = 9        | Main effect of<br>genotype: F(1, 33) =<br>1.394        | 0.2461  | N/A                   |           |
|        |       |                                       | Females:<br>Mnk1/2 +/+ =<br>10 Mnk1/2 -/- =<br>10 | Main effect of<br>gender: F(1, 33) =<br>3.970          | 0.0547  | N/A                   |           |

|  |          |                                 |                                             |                                                  |          |            |                                              |
|--|----------|---------------------------------|---------------------------------------------|--------------------------------------------------|----------|------------|----------------------------------------------|
|  |          |                                 |                                             | Gender X Genotype Interaction: F(1, 19) = 18.45  | 0.0163   | Bonferroni | Males Mnk1/2 +/+ vs -/- t(33)=3.26, p<0.01   |
|  |          |                                 |                                             |                                                  |          | Bonferroni | Females Mnk1/2 +/+ vs -/- t(33)=1.80, p>0.05 |
|  | <b>d</b> | 2-way ANOVA (Gender X Genotype) | Males: Eif4e +/+ = 9<br>Eif4e ki/ki = 9     | Main effect of genotype: F(1, 31) = 12.66        | 0.0012   | N/A        |                                              |
|  |          |                                 | Females: Eif4e +/+ = 8<br>Eif4e ki/ki = 9   | Main effect of gender: F(1, 31) = 21.20          | < 0.0001 | N/A        |                                              |
|  |          |                                 |                                             | Gender X Genotype Interaction: F(1, 31) = 0.1191 | 0.7323   | N/A        |                                              |
|  | <b>e</b> | 2-way ANOVA (Gender X Genotype) | Males: Mnk1/2 +/+ = 8<br>Mnk1/2 -/- = 9     | Main effect of genotype: F(1, 33) = 1.903        | 0.177    | N/A        |                                              |
|  |          |                                 | Females: Mnk1/2 +/+ = 10<br>Mnk1/2 -/- = 10 | Main effect of gender: F(1, 33) = 0.1129         | 0.739    | N/A        |                                              |
|  |          |                                 |                                             | Gender X Genotype Interaction: F(1, 33) = 4.54   | 0.0407   | Bonferroni | Males Mnk1/2 +/+ vs -/- t(33)=0.51, p>0.05   |
|  |          |                                 |                                             |                                                  |          | Bonferroni | Females Mnk1/2 +/+ vs -/- t(33)=2.59, p<0.05 |
|  | <b>f</b> | 2-way ANOVA (Gender X Genotype) | Males: Eif4e +/+ = 9<br>Eif4e ki/ki = 9     | Main effect of genotype: F(1, 31) = 0.3155       | 0.5784   | N/A        |                                              |

|  |          |                                       |                                                |                                                          |          |     |
|--|----------|---------------------------------------|------------------------------------------------|----------------------------------------------------------|----------|-----|
|  |          |                                       | Females:<br>Eif4e +/+ = 8<br>Eif4e ki/ki = 9   | Main effect of<br>gender: F(1, 31) =<br>1.345            | 0.255    | N/A |
|  |          |                                       |                                                | Gender X Genotype<br>Interaction: F(1, 31)<br>= 0.4449   | 0.5097   | N/A |
|  | <b>g</b> | 2-way ANOVA<br>(Gender X<br>Genotype) | Males:<br>Mnk1/2 +/+ =<br>12 Mnk1/2 -/- =<br>8 | Main effect of<br>genotype: F(1, 36) =<br>20.01          | < 0.0001 | N/A |
|  |          |                                       | Females:<br>Mnk1/2 +/+ = 7<br>Mnk1/2 -/- = 13  | Main effect of<br>gender: F(1, 36) =<br>0.3780           | 0.5425   | N/A |
|  |          |                                       |                                                | Gender X Genotype<br>Interaction: F(1, 36)<br>= 0.003936 | 0.9503   | N/A |
|  | <b>h</b> | 2-way ANOVA<br>(Gender X<br>Genotype) | Males:<br>Eif4e +/+ = 17<br>Eif4e ki/ki = 18   | Main effect of<br>genotype: F(1, 61) =<br>20.72          | < 0.0001 | N/A |
|  |          |                                       | Females:<br>Eif4e +/+ = 11<br>Eif4e ki/ki = 19 | Main effect of<br>gender: F(1, 61) =<br>2.174            | 0.1455   | N/A |
|  |          |                                       |                                                | Gender X Genotype<br>Interaction: F(1, 61)<br>= 0.2857   | 0.5949   | N/A |
|  | <b>i</b> | 2-way ANOVA<br>(Gender X<br>Genotype) | Males:<br>Mnk1/2 +/+ =<br>12 Mnk1/2 -/- =<br>8 | Main effect of<br>genotype: F(1, 36) =<br>30.99          | < 0.0001 | N/A |

|               |          |                                                                                                 |                                                    |                                                                 |        |            |                                                |
|---------------|----------|-------------------------------------------------------------------------------------------------|----------------------------------------------------|-----------------------------------------------------------------|--------|------------|------------------------------------------------|
|               |          |                                                                                                 | Females:<br>Mnk1/2 +/+ = 7<br>Mnk1/2 -/- = 13      | Main effect of<br>gender: F(1, 36) =<br>6.503                   | 0.0152 | N/A        |                                                |
|               |          |                                                                                                 |                                                    | Gender X Genotype<br>Interaction: F(1, 36)<br>= 0.7873          | 0.3808 | N/A        |                                                |
|               | <b>j</b> | 2-way ANOVA<br>(Gender X<br>Genotype)                                                           | Males:<br>Eif4e +/+ = 17<br>Eif4e ki/ki = 18       | Main effect of<br>genotype: F(1, 61) =<br>1.317                 | 0.2557 | N/A        |                                                |
|               |          |                                                                                                 | Females:<br>Eif4e +/+ = 11<br>Eif4e ki/ki = 19     | Main effect of<br>gender: F(1, 61) =<br>1.739                   | 0.1923 | N/A        |                                                |
|               |          |                                                                                                 |                                                    | Gender X Genotype<br>Interaction: F(1, 61)<br>= 0.01223         | 0.9123 | N/A        |                                                |
| <b>Fig. 2</b> | <b>b</b> | 20 $\mu$ M 5-HT<br>doseRepeated<br>measures 2-<br>way ANOVA<br>(5-HT<br>exposure X<br>Genotype) | Eif4e +/+ = 7<br>cells<br>Eif4e ki/ki = 8<br>cells | Main effect of<br>genotype: F(1, 13) =<br>2.110                 | 0.1701 |            |                                                |
|               |          |                                                                                                 |                                                    | Main effect of 5-HT<br>exposure: F(1, 13) =<br>5.899            | 0.0304 |            |                                                |
|               |          |                                                                                                 |                                                    | 5-HT exposure X<br>Genotype<br>Interaction: F(1, 13)<br>= 6.962 | 0.0205 | Bonferroni | Baseline +/+ vs ki/ki<br>t(26)=0.05899, p>0.05 |
|               |          |                                                                                                 |                                                    |                                                                 |        | Bonferroni | 5-HT +/+ vs ki/ki<br>t(26)=2.576, p<0.05       |

|  |                                                                               |                                              |                                                        |        |            |                                           |
|--|-------------------------------------------------------------------------------|----------------------------------------------|--------------------------------------------------------|--------|------------|-------------------------------------------|
|  | 50 $\mu$ M 5-HT doseRepeated measures 2-way ANOVA (5-HT exposure X Genotype)  | Eif4e +/+ = 4 cells<br>Eif4e ki/ki = 5 cells | Main effect of genotype: F(1, 7) = 5.883               | 0.0457 |            |                                           |
|  |                                                                               |                                              | Main effect of 5-HT exposure: F(1, 7) = 16.05          | 0.0051 |            |                                           |
|  |                                                                               |                                              | 5-HT exposure X Genotype Interaction: F(1, 7) = 22.22  | 0.0022 | Bonferroni | Baseline +/+ vs ki/ki t(14)=0.133, p>0.05 |
|  |                                                                               |                                              |                                                        |        | Bonferroni | 5-HT +/+ vs ki/ki t(14)=4.235, p<0.01     |
|  | 100 $\mu$ M 5-HT doseRepeated measures 2-way ANOVA (5-HT exposure X Genotype) | Eif4e +/+ = 5 cells<br>Eif4e ki/ki = 6 cells | Main effect of genotype: F(1, 9) = 0.2451              | 0.6324 |            |                                           |
|  |                                                                               |                                              | Main effect of 5-HT exposure: F(1, 9) = 13.93          | 0.0047 |            |                                           |
|  |                                                                               |                                              | 5-HT exposure X Genotype Interaction: F(1, 9) = 0.0329 | 0.86   |            |                                           |

|               |          |                                    |                                                |                                           |          |     |
|---------------|----------|------------------------------------|------------------------------------------------|-------------------------------------------|----------|-----|
|               | <b>d</b> | Unpaired t-test                    | Eif4e +/+ = 56 cells<br>Eif4e ki/ki = 43 cells | t(97) = 5.533                             | < 0.0001 | N/A |
|               | <b>e</b> | Unpaired t-test                    | Eif4e +/+ = 8<br>Eif4e ki/ki = 7               | t(13) = 1.451                             | 0.1705   | N/A |
|               | <b>f</b> | Unpaired t-test                    | Eif4e +/+ = 27 cells<br>Eif4e ki/ki = 16 cells | t(41) = 0.7522                            | 0.4562   | N/A |
|               | <b>g</b> | Unpaired t-test                    | Eif4e +/+ = 6<br>Eif4e ki/ki = 5               | t(9) = 1.325                              | 0.2179   | N/A |
|               | <b>h</b> | DRD Unpaired t-test                | Eif4e +/+ = 4<br>Eif4e ki/ki = 5               | t(7) = 1.076                              | 0.3174   | N/A |
|               |          | DRL Unpaired t-test                |                                                | t(7) = 0.0973                             | 0.9252   | N/A |
|               |          | PDR Unpaired t-test                |                                                | t(7) = 0.3572                             | 0.7315   | N/A |
|               |          | DRV Unpaired t-test                |                                                | t(7) = 2.080                              | 0.0761   | N/A |
|               |          | DRD Unpaired t-test                | Eif4e +/+ = 4<br>Eif4e ki/ki = 5               | t(7) = 1.779                              | 0.1185   | N/A |
|               |          | DRL Unpaired t-test                |                                                | t(7) = 1.773                              | 0.1196   | N/A |
|               |          | PDR Unpaired t-test                |                                                | t(7) = 2.463                              | 0.0437   | N/A |
|               |          | DRV Unpaired t-test                |                                                | t(7) = 2.657                              | 0.0326   | N/A |
| <b>Fig. 3</b> | <b>a</b> | 2-way ANOVA (Treatment X Genotype) | S Mnk1/2 +/+ = 7<br>F Mnk1/2 +/+ = 10          | Main effect of genotype: F(1, 32) = 25.47 | < 0.0001 | N/A |

|               |          |                                    |                                                              |                                                    |          |     |
|---------------|----------|------------------------------------|--------------------------------------------------------------|----------------------------------------------------|----------|-----|
|               |          |                                    | S Mnk1/2 -/- = 9<br>F Mnk1/2 -/- = 10                        | Main effect of treatment: F(1, 32) = 53.10         | < 0.0001 | N/A |
|               |          |                                    |                                                              | Treatment X Genotype Interaction: F(1, 32) = 2.795 | 0.1043   | N/A |
|               | <b>b</b> | 2-way ANOVA (Treatment X Genotype) | S Eif4e +/+ = 9<br>F Eif4e +/+ = 6                           | Main effect of genotype: F(1, 28) = 23.46          | < 0.0001 | N/A |
|               |          |                                    | S Eif4e ki/ki = 8<br>F Eif4e ki/ki = 9                       | Main effect of treatment: F(1, 28) = 7.860         | 0.0091   | N/A |
|               |          |                                    |                                                              | Treatment X Genotype Interaction: F(1, 28) = 1.191 | 0.2844   | N/A |
|               | <b>c</b> | 1-way ANOVA                        | Sal. = 6<br>Fluox. = 6<br>Chr. Fluox. = 6<br>Rep. Cital. = 6 | F(3, 20) = 0.6547                                  | 0.5894   | N/A |
|               | <b>d</b> | 1-way ANOVA                        | Sal. = 6<br>Fluox. = 6<br>Chr. Fluox. = 6<br>Rep. Cital. = 6 | F(3, 20) = 0.9680                                  | 0.4273   | N/A |
| <b>Fig. 4</b> | <b>c</b> | p-eIF4E/eIF4E Unpaired t-test      | Vehicle = 7<br>Cercosporamide (20 mg/kg) = 7                 | t(12) = 2.994                                      | 0.0112   | N/A |
|               |          | eIF4E/GAPDH Unpaired t-test        | Vehicle = 7<br>Cercosporamide (20 mg/kg) = 7                 | t(12) = 0.0840                                     | 0.9344   | N/A |



|  |          |                                                                          |                                                                 |                                                        |        |            |                                            |
|--|----------|--------------------------------------------------------------------------|-----------------------------------------------------------------|--------------------------------------------------------|--------|------------|--------------------------------------------|
|  | <b>d</b> | Unpaired t-test                                                          | Vehicle = 8<br>Cercosporamide (20 mg/kg)= 7                     | t(13) = 2.645                                          | 0.0202 | N/A        |                                            |
|  | <b>f</b> | Eif4e +/+<br>Repeated measures 2-way ANOVA (5-HT exposure X Treatment)   | Eif4e +/+ 0 mg/kg = 5 cells<br>Eif4e +/+ 20 mg/kg = 5 cells     | Main effect of Treatment: F(1, 8) = 8.541              | 0.0192 | N/A        |                                            |
|  |          |                                                                          |                                                                 | Main effect of 5-HT exposure: F(1, 8) = 4.027          | 0.0797 | N/A        |                                            |
|  |          |                                                                          |                                                                 | 5-HT exposure X Treatment Interaction: F(1, 8) = 7.093 | 0.0287 | Bonferroni | Baseline 0 vs 20 mg/kg t(16)=1.157, p>0.05 |
|  |          |                                                                          |                                                                 |                                                        |        | Bonferroni | 5-HT 0 vs 20 mg/kg t(16)=3.872, p<0.01     |
|  |          | Eif4e ki/ki<br>Repeated measures 2-way ANOVA (5-HT exposure X Treatment) | Eif4e ki/ki 0 mg/kg = 7 cells<br>Eif4e ki/ki 20 mg/kg = 5 cells | Main effect of Treatment: F(1, 10) = 1.913             | 0.1967 | N/A        |                                            |
|  |          |                                                                          |                                                                 | Main effect of 5-HT exposure: F(1, 10) = 0.3711        | 0.556  | N/A        |                                            |
|  |          |                                                                          |                                                                 | 5-HT exposure X Genotype Interaction: F(1, 10)         | 0.794  | N/A        |                                            |

|               |          |                                                            |                                                             |                                                    |        |                                                                                                                    |
|---------------|----------|------------------------------------------------------------|-------------------------------------------------------------|----------------------------------------------------|--------|--------------------------------------------------------------------------------------------------------------------|
|               |          |                                                            |                                                             | = 0.072                                            |        |                                                                                                                    |
|               | <b>g</b> | Firing rate data<br>2-way ANOVA<br>(Treatment X Genotype)  | 0 mg/kg Eif4e<br>+/+ = 33<br>20 mg/kg Eif4e<br>+/+ = 22     | Main effect of genotype: F(1, 91) = 10.96          | 0.0013 | Planned pair-wise comparisons with Bonferroni correction<br>0 mg/kg Eif4e +/+ vs Eif4e ki/ki t(91) = 3.825, p<0.01 |
|               |          |                                                            | 0 mg/kg Eif4e<br>ki/ki = 22<br>20 mg/kg Eif4e<br>ki/ki = 18 | Main effect of treatment: F(1, 91) = 6.907         | 0.0101 | 0 mg/kg Eif4e +/+ vs 20 mg/kg Eif4e +/+ t(91) = 3.304, p<0.01                                                      |
|               |          |                                                            |                                                             | Treatment X Genotype Interaction: F(1, 91) = 2.883 | 0.0929 | 0 mg/kg Eif4e ki/ki vs 20 mg/kg Eif4e ki/ki t(91) = 0.6153, p>0.05                                                 |
|               |          | Neurons per track<br>2-way ANOVA<br>(Treatment X Genotype) | 0 mg/kg Eif4e<br>+/+ = 6<br>20 mg/kg Eif4e<br>+/+ = 10      | Main effect of genotype: F(1, 21) = 0.009          | 0.9254 | N/A                                                                                                                |
|               |          |                                                            | 0 mg/kg Eif4e<br>ki/ki = 4<br>20 mg/kg Eif4e<br>ki/ki = 5   | Main effect of treatment: F(1, 21) = 3.087         | 0.0935 | N/A                                                                                                                |
|               |          |                                                            |                                                             | Treatment X Genotype Interaction: F(1, 21) = 0.018 | 0.8935 | N/A                                                                                                                |
| <b>Fig. 5</b> | <b>d</b> | Unpaired t-test                                            | Eif4e +/+ = 3<br>Eif4e ki/ki = 3                            | t(4) = 0.2907                                      | 0.7857 | N/A                                                                                                                |

|  |          |                                         |                                        |                                                   |        |     |
|--|----------|-----------------------------------------|----------------------------------------|---------------------------------------------------|--------|-----|
|  | <b>e</b> | Unpaired t-test                         | Eif4e +/+ = 6<br>Eif4e ki/ki = 6       | t(10) = 2.679                                     | 0.0231 | N/A |
|  | <b>f</b> | Unpaired t-test                         | Eif4e +/+ = 7<br>Eif4e ki/ki = 8       | t(13) = 2.202                                     | 0.0463 | N/A |
|  | <b>g</b> | Unpaired t-test with Welch's correction | Eif4e +/+ = 9<br>Eif4e ki/ki = 10      | t(9.183) = 3.222                                  | 0.0102 | N/A |
|  | <b>h</b> | Unpaired t-test with Welch's correction | Eif4e +/+ = 10<br>Eif4e ki/ki = 12     | t(12.92) = 2.227                                  | 0.0443 | N/A |
|  | <b>i</b> | Unpaired t-test                         | Eif4e +/+ = 6<br>Eif4e ki/ki = 5       | t(9) = 2.973                                      | 0.0156 | N/A |
|  | <b>j</b> | 2-way ANOVA (Treatment X Genotype)      | S Eif4e +/+ = 3<br>L Eif4e +/+ = 3     | Main effect of genotype: F(1, 8) = 6.4783         | 0.0344 | N/A |
|  |          |                                         | S Eif4e ki/ki = 3<br>L Eif4e ki/ki = 3 | Main effect of treatment: F(1, 8) = 40.72         | 0.0002 | N/A |
|  |          |                                         |                                        | Treatment X Genotype Interaction: F(1, 8) = 2.516 | 0.1514 | N/A |
|  | <b>l</b> | 2-way ANOVA (Treatment X Genotype)      | S Eif4e +/+ = 6<br>L Eif4e +/+ = 3     | Main effect of genotype: F(1, 15) = 7.299         | 0.0164 | N/A |
|  |          |                                         | S Eif4e ki/ki = 6<br>L Eif4e ki/ki = 4 | Main effect of treatment: F(1, 15) = 25.09        | 0.0002 | N/A |

|               |          |                                          |                                             |                                                             |        |            |                                                          |
|---------------|----------|------------------------------------------|---------------------------------------------|-------------------------------------------------------------|--------|------------|----------------------------------------------------------|
|               |          |                                          |                                             | Treatment X<br>Genotype<br>Interaction: F(1, 15)<br>= 4.624 | 0.0482 | Bonferroni | S Eif4e ki/ki vs L Eif4e ki/ki<br>t(15) = 5.309, p<0.001 |
|               |          |                                          |                                             |                                                             |        | Bonferroni | L Eif4e +/+ vs L Eif4e ki/ki<br>t(15) = 3.041, p<0.05    |
| <b>Fig. 6</b> | <b>a</b> | 2-way ANOVA<br>(Treatment X<br>Genotype) | S Eif4e +/+ = 11<br>DN Eif4e +/+ = 7        | Main effect of<br>genotype: F(1, 32) =<br>3.193             | 0.0834 | N/A        |                                                          |
|               |          |                                          | S Eif4e ki/ki =<br>10 DN Eif4e<br>ki/ki = 8 | Main effect of<br>treatment: F(1, 32) =<br>5.703            | 0.023  | N/A        |                                                          |
|               |          |                                          |                                             | Treatment X<br>Genotype<br>Interaction: F(1, 32)<br>= 6.657 | 0.0147 | Bonferroni | S Eif4e +/+ vs S Eif4e ki/ki<br>t(32) = 3.385, p<0.01    |
|               |          |                                          |                                             |                                                             |        | Bonferroni | S Eif4e ki/ki vs DN Eif4e<br>ki/ki t(32) = 3.574, p<0.01 |
|               | <b>b</b> | 2-way ANOVA<br>(Treatment X<br>Genotype) | S Eif4e +/+ = 10<br>DN Eif4e +/+ = 8        | Main effect of<br>genotype: F(1, 30) =<br>2.394             | 0.1323 | N/A        |                                                          |
|               |          |                                          | S Eif4e ki/ki = 8<br>DN Eif4e ki/ki =<br>8  | Main effect of<br>treatment: F(1, 30) =<br>1.661            | 0.2073 | N/A        |                                                          |
|               |          |                                          |                                             | Treatment X<br>Genotype<br>Interaction: F(1, 30)<br>= 4.841 | 0.0356 | Bonferroni | S Eif4e +/+ vs S Eif4e ki/ki<br>t(30) = 2.722, p<0.05    |
|               |          |                                          |                                             |                                                             |        | Bonferroni | S Eif4e ki/ki vs DN Eif4e<br>ki/ki t(30) = 2.405, p<0.05 |

|               |          |                                                                                    |                                                               |                                                             |            |            |                                                          |
|---------------|----------|------------------------------------------------------------------------------------|---------------------------------------------------------------|-------------------------------------------------------------|------------|------------|----------------------------------------------------------|
|               | <b>d</b> | 2-way ANOVA<br>(Treatment X<br>Genotype)                                           | S Eif4e +/+ = 7<br>DN Eif4e +/+ = 8                           | Main effect of<br>genotype: F(1, 27) =<br>6.316             | 0.0182     | N/A        |                                                          |
|               |          |                                                                                    | S Eif4e ki/ki = 8<br>DN Eif4e ki/ki =<br>8                    | Main effect of<br>treatment: F(1, 27) =<br>3.407            | 0.0759     | N/A        |                                                          |
|               |          |                                                                                    |                                                               | Treatment X<br>Genotype<br>Interaction: F(1, 27)<br>= 6.791 | 0.0147     | Bonferroni | S Eif4e +/+ vs S Eif4e ki/ki<br>t(27) = 3.559, p<0.01    |
|               |          |                                                                                    |                                                               |                                                             |            | Bonferroni | S Eif4e ki/ki vs DN Eif4e<br>ki/ki t(27) = 3.204, p<0.05 |
|               | <b>e</b> | 2-way ANOVA<br>(Treatment X<br>Genotype)                                           | S Eif4e +/+ = 7<br>DN Eif4e +/+ =<br>10                       | Main effect of<br>genotype: F(1, 32) =<br>7.679             | 0.0092     | N/A        |                                                          |
|               |          |                                                                                    | S Eif4e ki/ki =<br>10 DN Eif4e<br>ki/ki = 9                   | Main effect of<br>treatment: F(1, 32) =<br>0.902            | 0.3495     | N/A        |                                                          |
|               |          |                                                                                    |                                                               | Treatment X<br>Genotype<br>Interaction: F(1, 32)<br>= 4.364 | 0.0447     | Bonferroni | S Eif4e +/+ vs S Eif4e ki/ki<br>t(32) = 3.322, p<0.05    |
| <b>Fig. 7</b> | <b>c</b> | Males<br>Repeated<br>measures 2-<br>way ANOVA<br>(5-HT<br>exposure X<br>Treatment) | S Eif4e +/+ = 10<br>DN Eif4e +/+ = 8<br>TNFa Eif4e +/+<br>= 9 | Main effect of 5-HT<br>exposure: F(1, 24) =<br>44.10        | P < 0.0001 | N/A        |                                                          |
|               |          |                                                                                    |                                                               | Main effect of<br>treatment: F(2, 24) =<br>13.48            | P < 0.0001 | N/A        |                                                          |

|  |                                                                                                |                                                           |  |                                                               |              |            |                                                                   |
|--|------------------------------------------------------------------------------------------------|-----------------------------------------------------------|--|---------------------------------------------------------------|--------------|------------|-------------------------------------------------------------------|
|  |                                                                                                |                                                           |  | 5-HT exposure X Treatment<br>intention: $F(2, 24) = 7.604$    | $P = 0.0028$ | Bonferroni | Eif4e +/+ Saline: Baseline vs 5-HT $t(24) = 6.411$ , $p < 0.0001$ |
|  |                                                                                                |                                                           |  |                                                               |              | Bonferroni | Eif4e +/+ DN TNF: Baseline vs 5-HT $t(24) = 4.374$ , $p < 0.001$  |
|  | Females<br>Repeated<br>measures 2-<br>way ANOVA<br>(5-HT<br>exposure X<br>Treatment)           | S Eif4e +/+ = 9<br>DN Eif4e +/+ = 7<br>TNFa Eif4e +/+ = 6 |  | Main effect of 5-HT<br>exposure: $F(1, 19) = 15.56$           | $P = 0.0009$ | N/A        |                                                                   |
|  |                                                                                                |                                                           |  | Main effect of<br>treatment: $F(2, 19) = 8.662$               | $P = 0.0021$ | N/A        |                                                                   |
|  |                                                                                                |                                                           |  | 5-HT exposure X<br>Treatment<br>intention: $F(2, 19) = 5.224$ | $P = 0.0156$ | Bonferroni | Eif4e +/+ Saline: Baseline vs 5-HT $t(19) = 4.130$ , $p < 0.01$   |
|  |                                                                                                |                                                           |  |                                                               |              | Bonferroni | Eif4e +/+ DN TNF: Baseline vs 5-HT $t(19) = 3.597$ , $p < 0.01$   |
|  | <b>d</b><br>Males<br>Repeated<br>measures 2-<br>way ANOVA<br>(5-HT<br>exposure X<br>Treatment) | S Eif4e ki/ki = 11<br>DN Eif4e ki/ki = 8                  |  | Main effect of 5-HT<br>exposure: $F(1, 17) = 19.96$           | $0.0003$     | N/A        |                                                                   |

|  |                                                                   |                                         |                                                           |                                               |            |                                                                    |
|--|-------------------------------------------------------------------|-----------------------------------------|-----------------------------------------------------------|-----------------------------------------------|------------|--------------------------------------------------------------------|
|  |                                                                   |                                         | Main effect of treatment: $F(1, 17) = 5.677$              | 0.0291                                        | N/A        |                                                                    |
|  |                                                                   |                                         | 5-HT exposure X Treatment Interaction: $F(1, 17) = 16.59$ | 0.0008                                        | Bonferroni | Eif4e ki/ki DN TNF: Baseline vs 5-HT $t(34) = 3.649$ , $p < 0.01$  |
|  | Females Repeated measures 2-way ANOVA (5-HT exposure X Treatment) | S Eif4e ki/ki = 9<br>DN Eif4e ki/ki = 9 | Main effect of 5-HT exposure: $F(1, 16) = 7.442$          | 0.0149                                        | N/A        |                                                                    |
|  |                                                                   |                                         | Main effect of treatment: $F(1, 16) = 1.673$              | 0.2143                                        | N/A        |                                                                    |
|  |                                                                   |                                         | 5-HT exposure X Treatment Interaction: $F(1, 16) = 12.65$ | 0.0026                                        | Bonferroni | Eif4e ki/ki DN TNF: Baseline vs 5-HT $t(16) = 4.444$ , $p < 0.001$ |
|  | e                                                                 | 2-way ANOVA (Treatment X Genotype)      | S Eif4e +/- = 33<br>DN Eif4e +/- = 31                     | Main effect of genotype: $F(1, 109) = 16.17$  | 0.0001     | N/A                                                                |
|  |                                                                   |                                         | S Eif4e ki/ki = 16<br>DN Eif4e ki/ki = 33                 | Main effect of treatment: $F(1, 109) = 5.814$ | 0.0176     | N/A                                                                |
|  |                                                                   |                                         | Treatment X Genotype Interaction: $F(1, 109) = 3.994$     | 0.0482                                        | Bonferroni | S Eif4e +/- vs S Eif4e ki/ki $t(109) = 3.895$ , $p < 0.001$        |

|                 |          |                                                  |                             |                                                |          |            |                                            |
|-----------------|----------|--------------------------------------------------|-----------------------------|------------------------------------------------|----------|------------|--------------------------------------------|
|                 |          |                                                  |                             |                                                |          | Bonferroni | Eif4e ki/ki S vs DN t(109) = 2.853, p<0.05 |
| <b>Figure 8</b> | <b>b</b> | Repeated measures 2-way ANOVA (Time X Treatment) | S WT = 4<br>TNF WT = 6      | Main effect of time: F(3, 24) = 28.96          | < 0.0001 | N/A        |                                            |
|                 |          |                                                  |                             | Main effect of treatment: F(1, 8) = 8.742      | 0.0182   | N/A        |                                            |
|                 |          |                                                  |                             | Time X Treatment Interaction: F(3, 24) = 23.11 | < 0.0001 | Bonferroni | 10 min S vs TNF t(32) = 4.068, p<0.01      |
|                 |          |                                                  |                             |                                                |          | Bonferroni | 15 min S vs TNF t(32) = 5.635, p<0.001     |
|                 | <b>e</b> | Repeated measures 2-way ANOVA (Time X Treatment) | S WT = 6<br>TNFalpha WT = 6 | Main effect of time: F(4, 50) = 2.794          | 0.0359   | N/A        |                                            |
|                 |          |                                                  |                             | Main effect of treatment: F(1, 50) = 26.76     | < 0.0001 | N/A        |                                            |
|                 |          |                                                  |                             | Time X Treatment Interaction: F(4, 50) = 3.043 | 0.0254   | Bonferroni | 600 sec S vs TNF t(50) = 4.040, p<0.001    |
|                 |          |                                                  |                             |                                                |          | Bonferroni | 800 sec S vs TNF t(50) = 4.005, p<0.01     |
|                 | <b>f</b> | Unpaired t-test                                  | S WT = 6<br>TNFalpha WT = 7 | t(11) = 3.432                                  | 0.0056   | N/A        |                                            |



|                             |              |                                                  |                                   |                                                |                |                              |                                          |
|-----------------------------|--------------|--------------------------------------------------|-----------------------------------|------------------------------------------------|----------------|------------------------------|------------------------------------------|
|                             | <b>j</b>     | Repeated measures 2-way ANOVA (Time X Treatment) | S WT = 7<br>TNFalpha WT = 6       | Main effect of time: F(4, 55) = 18.42          | < 0.0001       | N/A                          |                                          |
|                             |              |                                                  |                                   | Main effect of treatment: F(1, 55) = 173.1     | < 0.0001       | N/A                          |                                          |
|                             |              |                                                  |                                   | Time X Treatment Interaction: F(4, 55) = 16.41 | < 0.0001       | Bonferroni                   | 200 sec S vs TNF t(55) = 3.462, p<0.01   |
|                             |              |                                                  |                                   |                                                |                | Bonferroni                   | 400 sec S vs TNF t(55) = 7.466, p<0.0001 |
|                             |              |                                                  |                                   |                                                |                | Bonferroni                   | 600 sec S vs TNF t(55) = 9.072, p<0.0001 |
|                             |              |                                                  |                                   |                                                |                | Bonferroni                   | 800 sec S vs TNF t(55) = 9.418, p<0.0001 |
|                             | <b>k</b>     | Unpaired t-test                                  | S WT = 6<br>TNFalpha WT = 10      | t(14) = 2.193                                  | 0.0457         | N/A                          |                                          |
|                             |              |                                                  |                                   |                                                |                |                              |                                          |
| <b>Figure</b>               | <b>Panel</b> | <b>Test</b>                                      | <b>Group size</b>                 | <b>Statistic</b>                               | <b>P value</b> | <b>Pair-wise comparisons</b> | <b>Statistic</b>                         |
| <b>Supplementary Fig. 1</b> | <b>a</b>     | Unpaired t-test                                  | Mnk1/2 +/+ = 9<br>Mnk1/2 -/- = 9  | t(16) = 2.554                                  | 0.0212         | N/A                          |                                          |
|                             | <b>b</b>     | Unpaired t-test                                  | Eif4e +/+ = 6<br>Eif4e ki/ki = 7  | t(11) = 2.984                                  | 0.0124         | N/A                          |                                          |
|                             | <b>c</b>     | Repeated measures 2-way ANOVA (Time X Genotype)  | Mnk1/2 +/+ = 13<br>Mnk1/2 -/- = 8 | Main effect of genotype: F(1, 19) = 11.46      | 0.0031         | N/A                          |                                          |

|  |          |                                                              |                                      |                                                      |          |            |                                                    |
|--|----------|--------------------------------------------------------------|--------------------------------------|------------------------------------------------------|----------|------------|----------------------------------------------------|
|  |          |                                                              |                                      | Main effect of time:<br>F(1, 19) = 56.28             | < 0.0001 | N/A        |                                                    |
|  |          |                                                              |                                      | Time X Genotype<br>Interaction: F(1, 19)<br>= 7.120  | 0.0152   | Bonferroni | 1st exposure +/+ vs -/-<br>t(38) = 4.300, p<0.001  |
|  | <b>d</b> | Repeated<br>measures 2-<br>way ANOVA<br>(Time X<br>Genotype) | Mnk1/2 +/+ =<br>13 Mnk1/2 -/- =<br>8 | Main effect of<br>genotype: F(1, 19) =<br>27.14      | < 0.0001 | N/A        |                                                    |
|  |          |                                                              |                                      | Main effect of time:<br>F(1, 19) = 0.7655            | 0.3925   |            |                                                    |
|  |          |                                                              |                                      | Time X Genotype<br>Interaction: F(1, 19)<br>= 3.826  | 0.0653   |            |                                                    |
|  | <b>e</b> | Repeated<br>measures 2-<br>way ANOVA<br>(Time X<br>Genotype) | Mnk1/2 +/+ = 7<br>Mnk1/2 -/- = 14    | Main effect of<br>genotype: F(1, 19) =<br>6.430      | 0.0202   | N/A        |                                                    |
|  |          |                                                              |                                      | Main effect of time:<br>F(1, 19) = 49.31             | < 0.0001 | N/A        |                                                    |
|  |          |                                                              |                                      | Time X Genotype<br>Interaction: F (1, 19)<br>= 10.85 | 0.0038   | Bonferroni | 1st exposure +/+ vs -/-<br>t=4.230 df=38, p<0.0001 |
|  | <b>f</b> | Repeated<br>measures 2-<br>way ANOVA<br>(Time X<br>Genotype) | Mnk1/2 +/+ = 7<br>Mnk1/2 -/- = 14    | Main effect of<br>genotype: F(1, 19) =<br>23.56      | 0.0001   | N/A        |                                                    |
|  |          |                                                              |                                      | Main effect of time:<br>F(1, 19) = 7.729             | 0.0119   | N/A        |                                                    |

|                      |   |                                                          |                                              |                                                           |        |     |
|----------------------|---|----------------------------------------------------------|----------------------------------------------|-----------------------------------------------------------|--------|-----|
|                      |   |                                                          |                                              | Time X Genotype Interaction: $F(1, 19) = 2.698$           | 0.1169 | N/A |
| Supplementary Fig. 2 | a | Repeated measures 2-way ANOVA (5-HT exposure X Genotype) | Eif4e +/+ = 7 cells<br>Eif4e ki/ki = 8 cells | Main effect of genotype: $F(1, 13) = 1.253$               | 0.6992 | N/A |
|                      |   |                                                          |                                              | Main effect of 5-HT exposure: $F(1, 13) = 2.871$          | 0.114  | N/A |
|                      |   |                                                          |                                              | Interaction Genotype X 5-HT exposure: $F(1, 13) = 0.1561$ | 0.2832 | N/A |
|                      | b | Repeated measures 2-way ANOVA (5-HT exposure X Genotype) | Eif4e +/+ = 7 cells<br>Eif4e ki/ki = 8 cells | Main effect of genotype: $F(1, 13) = 1.846$               | 0.1974 | N/A |
|                      |   |                                                          |                                              | Main effect of 5-HT exposure: $F(1, 13) = 3.200$          | 0.097  | N/A |
|                      |   |                                                          |                                              | Interaction Genotype X 5-HT exposure: $F(1, 13) = 0.006$  | 0.9374 | N/A |
|                      | c | Repeated measures 2-way ANOVA (5-HT exposure X           | Eif4e +/+ = 7 cells<br>Eif4e ki/ki = 8 cells | Main effect of genotype: $F(1, 13) = 2.347$               | 0.1495 | N/A |

| Genotype) |          |                                                           |                                                            |                                                         |            |
|-----------|----------|-----------------------------------------------------------|------------------------------------------------------------|---------------------------------------------------------|------------|
|           |          |                                                           |                                                            | Main effect of 5-HT exposure: F(1, 13) = 8.354          | 0.0126 N/A |
|           |          |                                                           |                                                            | Interaction Genotype X 5-HT exposure: F(1, 13) = 3.068  | 0.1034 N/A |
|           | <b>f</b> | Repeated measures 2-way ANOVA (5-HT exposure X Treatment) | S Eif4e ki/ki = 11<br>DN Eif4e ki/ki = 8                   | Main effect of treatment: F(1, 17) = 9.569              | 0.0066 N/A |
|           |          |                                                           |                                                            | Main effect of 5-HT exposure: F(1, 17) = 2.301          | 0.1477 N/A |
|           |          |                                                           |                                                            | 5-HT exposure X Treatment Interaction: F(1, 17) = 0.094 | 0.7628 N/A |
|           | <b>g</b> | Repeated measures 2-way ANOVA (5-HT exposure X Treatment) | S Eif4e +/+ = 10<br>DN Eif4e +/+ = 8<br>TNFa Eif4e +/+ = 9 | Main effect of treatment: F(2, 24) = 0.5785             | 0.5684 N/A |
|           |          |                                                           |                                                            | Main effect of 5-HT exposure: F(1, 24) = 0.0067         | 0.9356 N/A |

|                                                  |   |                                                                   |                                    |                                                                   |            |                                            |                                                       |
|--------------------------------------------------|---|-------------------------------------------------------------------|------------------------------------|-------------------------------------------------------------------|------------|--------------------------------------------|-------------------------------------------------------|
|                                                  |   |                                                                   |                                    | 5-HT exposure X<br>Treatment<br>Interaction: F(2, 24)<br>= 0.9776 | 0.3907     | N/A                                        |                                                       |
| Supplementary<br>Fig. 3                          | a | Repeated<br>measures 2-<br>way ANOVA<br>(Treatment X<br>Genotype) | Eif4e +/+ = 5<br>Eif4e ki/ki = 6   | Main effect of<br>genotype: F(1, 9) =<br>15.38                    | 0.0035     | N/A                                        |                                                       |
|                                                  |   |                                                                   |                                    | Main effects of<br>treatment: F(1, 9) =<br>6.748                  | 0.0288     | N/A                                        |                                                       |
|                                                  |   |                                                                   |                                    | Treatment X<br>Genotype<br>Interaction: F(1, 9) =<br>8.545e-005   | 0.9928     | N/A                                        |                                                       |
|                                                  | b | Repeated<br>measures 2-<br>way ANOVA<br>(Treatment X<br>Genotype) | Eif4e +/+ = 5<br>Eif4e ki/ki = 6   | Main effect of<br>genotype: F(1, 9) =<br>0.1409                   | 0.7161     | N/A                                        |                                                       |
| Main effect of<br>treatment: F(2, 18) =<br>17.99 |   |                                                                   |                                    | < 0.0001                                                          | Bonferroni | 0.1 vs 0.3 dose: t(18) =<br>5.761, p<0.001 |                                                       |
|                                                  |   |                                                                   |                                    |                                                                   | Bonferroni | 0.1 vs 0.2 dose: t(18) =3.31,<br>p<0.05    |                                                       |
|                                                  |   |                                                                   |                                    | Treatment X<br>Genotype<br>Interaction: F (2, 18)<br>= 4.778      | 0.0216     | Bonferroni                                 | No pairwise (+/+ vs ki/ki)<br>comparisons significant |
|                                                  | c | Unpaired t-<br>test with<br>Welch's                               | Eif4e +/+ = 34<br>Eif4e ki/ki = 24 | t(53.77) = 2.751                                                  | 0.0081     | N/A                                        |                                                       |

|                             | correction |                                                          |                                               |                                                        |        |            |                                                    |
|-----------------------------|------------|----------------------------------------------------------|-----------------------------------------------|--------------------------------------------------------|--------|------------|----------------------------------------------------|
|                             | <b>d</b>   | Unpaired t-test                                          | Eif4e +/+ = 4<br>Eif4e ki/ki = 4              | t(6) = 1.037                                           | 0.3398 | N/A        |                                                    |
| <b>Supplementary Fig. 4</b> | <b>b</b>   | Repeated measures 2-way ANOVA (5-HT exposure X Genotype) | Eif4e +/+ = 8 cells<br>Eif4e ki/ki = 13 cells | Main effect of genotype: F(1, 19) = 14.55              | 0.0012 |            |                                                    |
|                             |            |                                                          |                                               | Main effect of 5-HT exposure: F(1, 19) = 14.99         | 0.001  |            |                                                    |
|                             |            |                                                          |                                               | 5-HT exposure X Genotype Interaction: F(1, 19) = 18.45 | 0.0004 | Bonferroni | Baseline +/+ vs ki/ki<br>t(38)=0.094, p>0.05       |
|                             |            |                                                          |                                               |                                                        |        | Bonferroni | 5-HT +/+ vs ki/ki<br>t(38)=5.714, p<0.0001         |
|                             | <b>c</b>   | Repeated measures 2-way ANOVA (5-HT exposure X Genotype) | Eif4e +/+ = 8 cells<br>Eif4e ki/ki = 13 cells | Main effect of genotype: F(1, 19) = 0.5311             | 0.475  | N/A        |                                                    |
|                             |            |                                                          |                                               | Main effect of 5-HT exposure: F(1, 19) = 0.006023      | 0.939  | N/A        |                                                    |
|                             |            |                                                          |                                               | Interaction Genotype X 5-HT exposure: F(1, 19) = 6.575 | 0.019  | Bonferroni | No pairwise (+/+ vs ki/ki) comparisons significant |

|  |          |                                                          |                                               |                                                         |         |     |
|--|----------|----------------------------------------------------------|-----------------------------------------------|---------------------------------------------------------|---------|-----|
|  | <b>d</b> | Repeated measures 2-way ANOVA (5-HT exposure X Genotype) | Eif4e +/+ = 8 cells<br>Eif4e ki/ki = 13 cells | Main effect of genotype: F(1, 19) = 1.358               | 0.259   | N/A |
|  |          |                                                          |                                               | Main effect of 5-HT exposure: F(1, 19) = 0.1745         | 0.6811  | N/A |
|  |          |                                                          |                                               | 5-HT exposure X Genotype Interaction: F(1, 19) = 0.0128 | 0.9113  | N/A |
|  | <b>e</b> | Repeated measures 2-way ANOVA (5-HT exposure X Genotype) | Eif4e +/+ = 8 cells<br>Eif4e ki/ki = 13 cells | Main effect of genotype: F(1, 19) = 0.3764              | 0.5472  | N/A |
|  |          |                                                          |                                               | Main effect of 5-HT exposure: F(1, 19) = 0.1239         | 0.7289  | N/A |
|  |          |                                                          |                                               | 5-HT exposure X Genotype Interaction: F(1, 19) = 0.4198 | 0.5252  | N/A |
|  | <b>f</b> | 2-way ANOVA (Treatment X Genotype)                       | S Eif4e +/+ = 6<br>F Eif4e +/+ = 6            | Main effect of genotype: F(1, 26) = 7.514               | 0.0109  | N/A |
|  |          |                                                          | S Eif4e ki/ki = 8<br>F Eif4e ki/ki = 10       | Main effect of treatment: F(1, 26) = 23.34              | <0.0001 | N/A |

|                                 |          |                                        |                                                |                                                                  |        |     |
|---------------------------------|----------|----------------------------------------|------------------------------------------------|------------------------------------------------------------------|--------|-----|
|                                 |          |                                        |                                                | Treatment X<br>Genotype<br>Interaction: $F(1, 26)$<br>$= 0.261$  | 0.6138 | N/A |
|                                 | <b>g</b> | 2-way ANOVA<br>(Treatment X<br>Stress) | Control Sal = 5<br>Control Ket = 6             | Main effect of stress:<br>$F(1, 19) = 0.5391$                    | 0.4718 | N/A |
|                                 |          |                                        | CSD Saline = 6<br>CSD Ket = 6                  | Main effect of<br>treatment: $F(1, 19) =$<br>1.080               | 0.3117 | N/A |
|                                 |          |                                        |                                                | Treatment X<br>Genotype<br>Interaction: $F(1, 19)$<br>$= 0.011$  | 0.9185 | N/A |
|                                 | <b>h</b> | 2-way ANOVA<br>(Treatment X<br>Stress) | Control Sal = 5<br>Control Ket = 6             | Main effect of stress:<br>$F(1, 19) = 0.3867$                    | 0.5515 | N/A |
|                                 |          |                                        | CSD Saline = 6<br>CSD Ket = 6                  | Main effect of<br>treatment: $F(1, 19) =$<br>0.1324              | 0.72   | N/A |
|                                 |          |                                        |                                                | Treatment X<br>Genotype<br>Interaction: $F(1, 19)$<br>$= 0.3867$ | 0.5414 | N/A |
| <b>Supplementary<br/>Fig. 5</b> | <b>a</b> | 2-way ANOVA<br>(Gender X<br>Genotype)  | Males:<br>Eif4e +/+ = 6<br>Eif4e ki/ki = 7     | Main effect of<br>genotype: $F(1, 29) =$<br>0.2713               | 0.6064 | N/A |
|                                 |          |                                        | Females:<br>Eif4e +/+ = 10<br>Eif4e ki/ki = 10 | Main effect of<br>gender: $F(1, 29) =$<br>0.0335                 | 0.8562 | N/A |



|                             |          |                                 |                                             |                                                 |        |     |
|-----------------------------|----------|---------------------------------|---------------------------------------------|-------------------------------------------------|--------|-----|
|                             |          |                                 |                                             | Gender X Genotype Interaction: F(1, 29) = 3.812 | 0.0606 | N/A |
|                             | <b>c</b> | 2-way ANOVA (Gender X Genotype) | Males: Eif4e +/+ = 9<br>Eif4e ki/ki = 7     | Main effect of genotype: F(1, 33) = 0.3689      | 0.5478 | N/A |
|                             |          |                                 | Females: Eif4e +/+ = 10<br>Eif4e ki/ki = 11 | Main effect of gender: F(1, 33) = 1.163         | 0.2886 | N/A |
|                             |          |                                 |                                             | Gender X Genotype Interaction: F(1, 33) = 1.689 | 0.2028 | N/A |
|                             | <b>e</b> | 2-way ANOVA (Gender X Genotype) | Males: Eif4e +/+ = 8<br>Eif4e ki/ki = 5     | Main effect of genotype: F(1, 23) = 0.1774      | 0.6775 | N/A |
|                             |          |                                 | Females: Eif4e +/+ = 7<br>Eif4e ki/ki = 7   | Main effect of gender: F(1, 23) = 0.4909        | 0.4906 | N/A |
|                             |          |                                 |                                             | Gender X Genotype Interaction: F(1, 23) = 1.864 | 0.1854 | N/A |
| <b>Supplementary Fig. 6</b> | <b>a</b> | Unpaired t-test (Mnk1/2 data)   | Mnk1/2 +/+ = 9<br>Mnk1/2 -/- = 9            | t(16) = 0.2797                                  | 0.7836 | N/A |
|                             |          | Unpaired t-test (Eif4e data)    | Eif4e +/+ = 11<br>Eif4e ki/ki = 10          | t(19) = 1.529                                   | 0.1426 | N/A |
|                             | <b>b</b> | Unpaired t-test (Mnk1/2 data)   | Mnk1/2 +/+ = 7<br>Mnk1/2 -/- = 13           | t(18) = 2.592                                   | 0.0184 | N/A |

|  |          |                                         |                                        |                                                      |        |     |
|--|----------|-----------------------------------------|----------------------------------------|------------------------------------------------------|--------|-----|
|  |          | Unpaired t-test (Eif4e data)            | Eif4e +/+ = 7<br>Eif4e ki/ki = 10      | t(15) = 3.072                                        | 0.0078 | N/A |
|  | <b>c</b> | Unpaired t-test with Welch's correction | Mnk1/2 +/+ = 7<br>Mnk1/2 -/- = 8       | t(7.134) = 2.384                                     | 0.048  | N/A |
|  | <b>d</b> | Unpaired t-test with Welch's correction | Mnk1/2 +/+ = 6<br>Mnk1/2 -/- = 12      | t(14.61) = 2.225                                     | 0.0423 | N/A |
|  | <b>e</b> | Unpaired t-test                         | Eif4e +/+ = 5<br>Eif4e ki/ki = 13      | t(16) = 1.313                                        | 0.2076 | N/A |
|  | <b>f</b> | Unpaired t-test with Welch's correction | Eif4e +/+ = 7<br>Eif4e ki/ki = 9       | t(9.297) = 2.283                                     | 0.0475 | N/A |
|  | <b>g</b> | Unpaired t-test with Welch's correction | Eif4e +/+ = 5<br>Eif4e ki/ki = 8       | t(7.679) = 2.877                                     | 0.0215 | N/A |
|  | <b>h</b> | 2-way ANOVA (Treatment X Genotype)      | S Eif4e +/+ = 4<br>F Eif4e +/+ = 4     | Main effect of genotype: F(1, 12) = 5.118            | 0.043  | N/A |
|  |          |                                         | S Eif4e ki/ki = 4<br>F Eif4e ki/ki = 4 | Main effect of treatment: F(1, 12) = 14.86           | 0.0023 | N/A |
|  |          |                                         |                                        | Treatment X Genotype Interaction: F(1, 12) = 0.02538 | 0.8761 | N/A |

|                             |          |                                    |                                        |                                                    |          |            |                                                     |
|-----------------------------|----------|------------------------------------|----------------------------------------|----------------------------------------------------|----------|------------|-----------------------------------------------------|
| <b>Supplementary Fig. 7</b> | <b>a</b> | 2-way ANOVA (Treatment X Genotype) | S Mnk1/2 +/+ = 9<br>DN Mnk1/2 +/+ = 10 | Main effect of genotype: F(1, 29) = 33.39          | < 0.0001 | N/A        |                                                     |
|                             |          |                                    | S Mnk1/2 -/- = 6<br>DN Mnk1/2 -/- = 8  | Main effect of treatment: F(1, 29) = 9.189         | 0.0051   | N/A        |                                                     |
|                             |          |                                    |                                        | Treatment X Genotype Interaction: F(1, 29) = 5.931 | 0.0213   | Bonferroni | S Mnk1/2 +/+ vs S Mnk1/2 -/- t(29) = 5.525, p<0.001 |
|                             |          |                                    |                                        |                                                    |          | Bonferroni | S Mnk1/2 -/- vs DN Mnk1/2 -/- t(29) = 3.589, p<0.01 |
|                             | <b>b</b> | 2-way ANOVA (Treatment X Genotype) | S Mnk1/2 +/+ = 8<br>DN Mnk1/2 +/+ = 10 | Main effect of genotype: F(1, 32) = 6.686          | 0.0145   | N/A        |                                                     |
|                             |          |                                    | S Mnk1/2 -/- = 8<br>DN Mnk1/2 -/- = 10 | Main effect of treatment: F(1, 32) = 5.572         | 0.0245   | N/A        |                                                     |
|                             |          |                                    |                                        | Treatment X Genotype Interaction: F(1, 32) = 7.141 | 0.0118   | Bonferroni | S Mnk1/2 +/+ vs S Mnk1/2 -/- t(32) = 3.527, p<0.001 |
|                             |          |                                    |                                        |                                                    |          | Bonferroni | S Mnk1/2 -/- vs DN Mnk1/2 -/- t(32) = 3.559, p<0.01 |

Supplementary Figure 9

Uncropped blot images

From Figure 3e

Phosphorylated eIF4E:

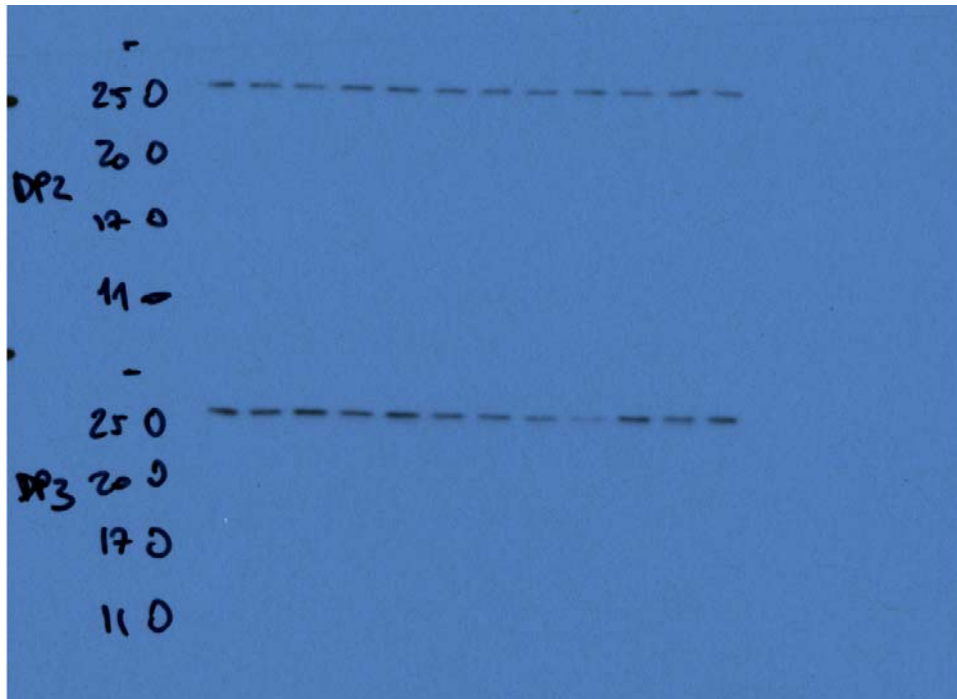

Total eIF4e:

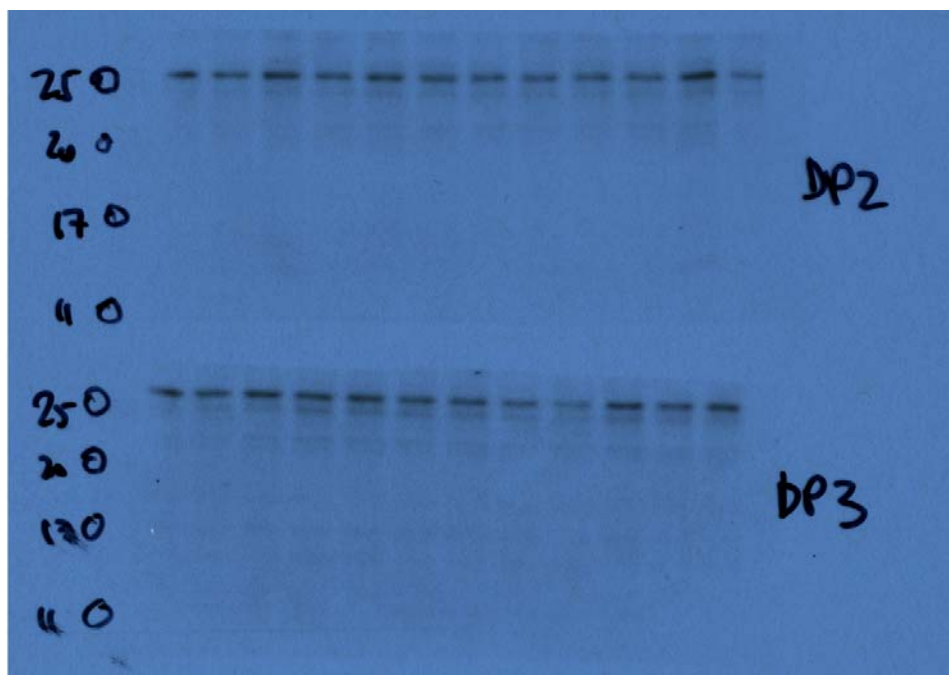

Supplementary Figure 9 (continued)

GAPDH:

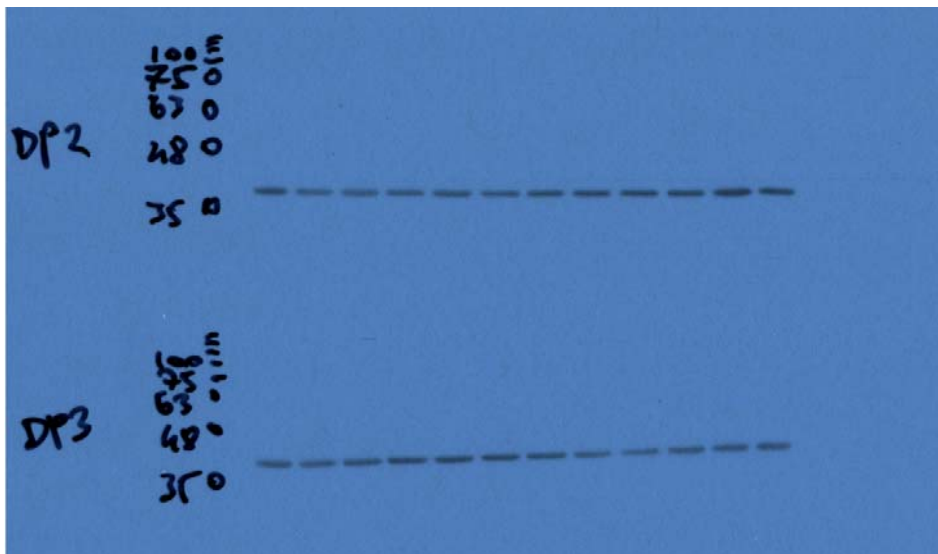

From Figure 4b:

Phosphorylated eIF4E:

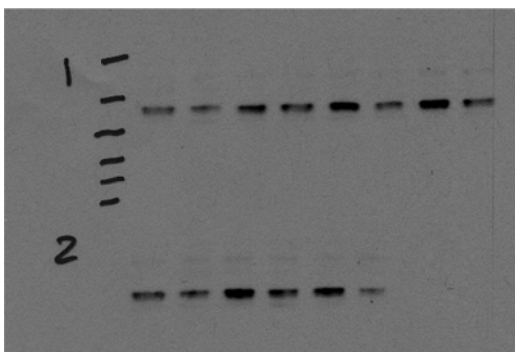

Total eIF4E:

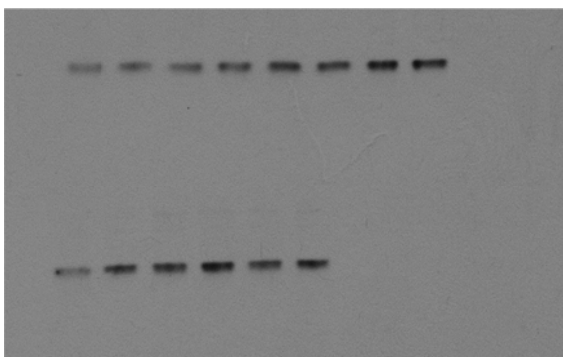

Supplementary Figure 9 (continued)

GAPDH:

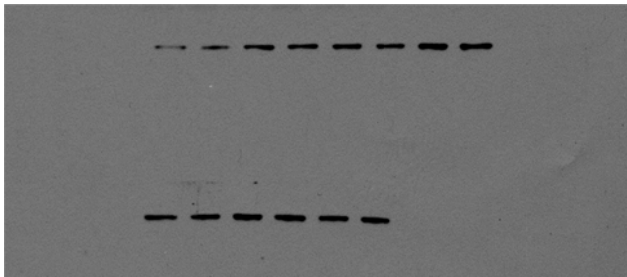

From Figure 5e-f:

$\text{I}\kappa\text{B}\alpha$  and phosphorylated eIF4E:

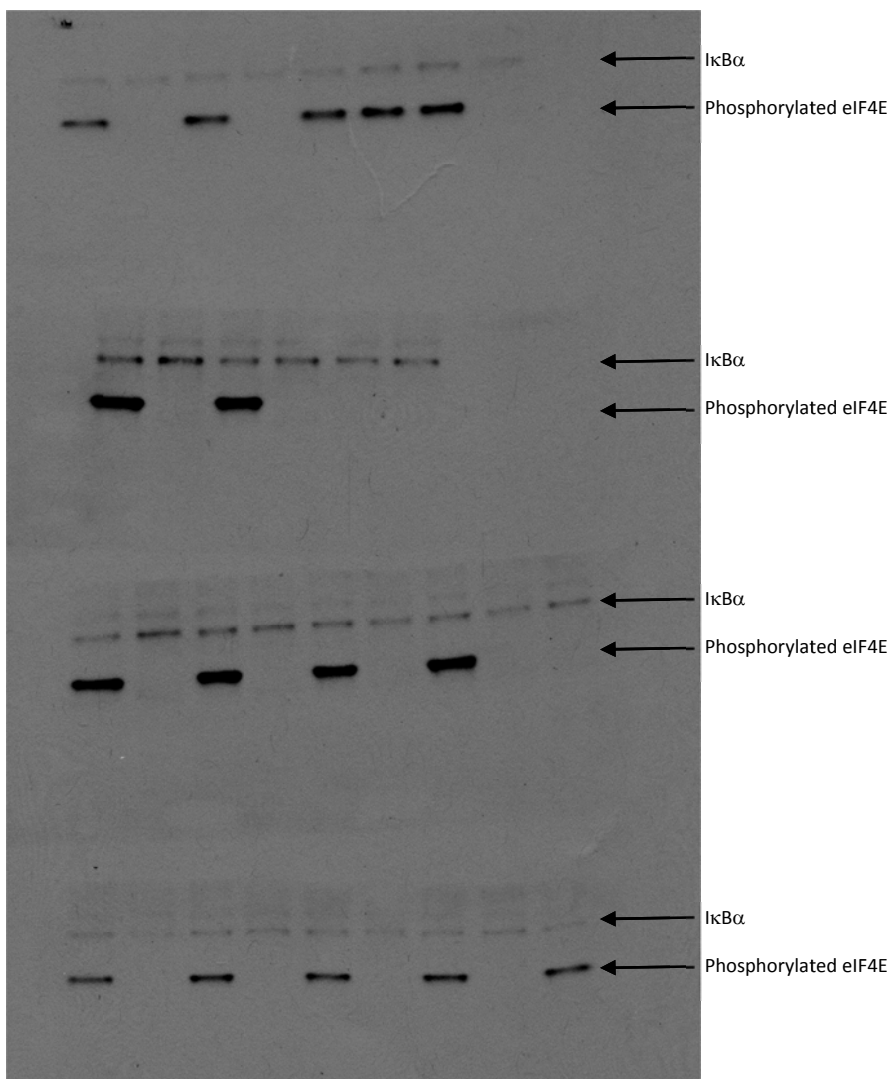

Supplementary Figure 9 (continued)

Total eIF4E:

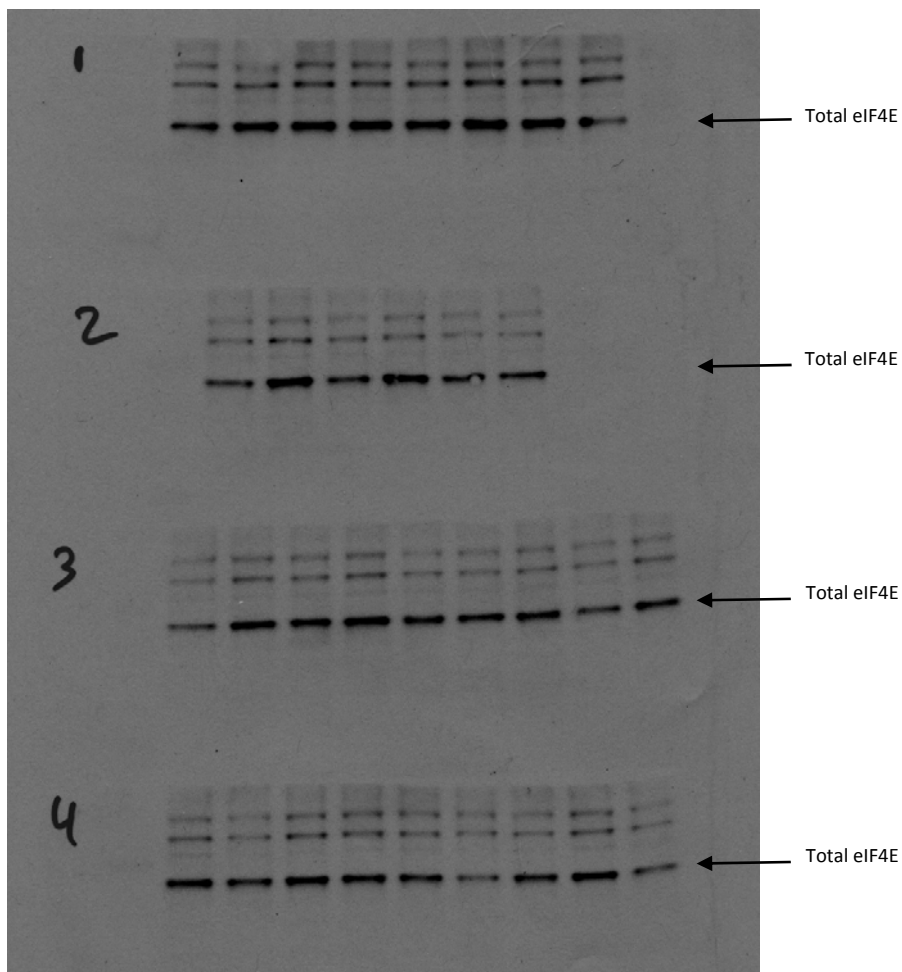

Supplementary Figure 9 (continued)

GAPDH:

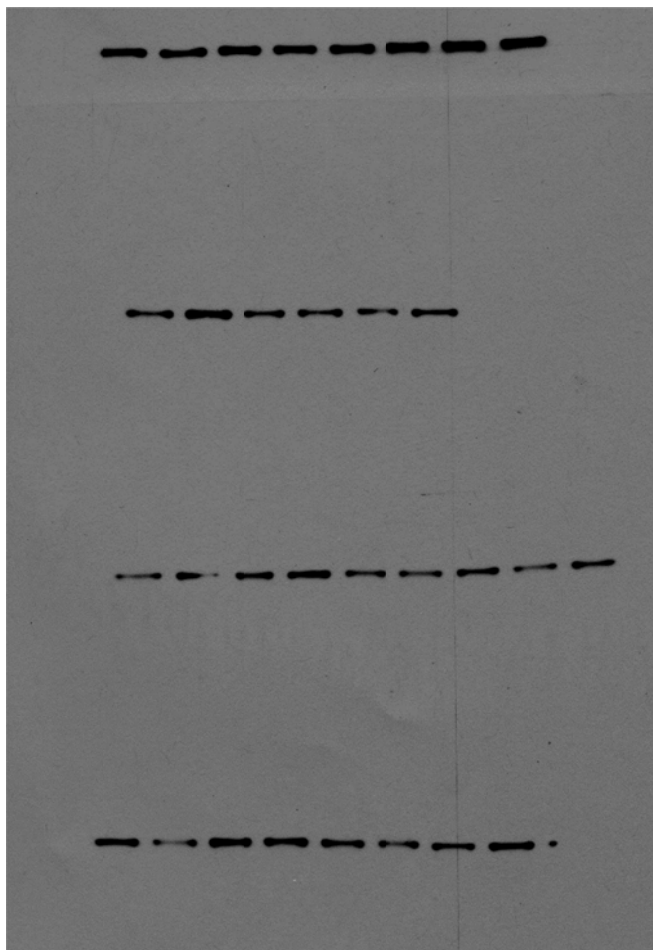



Supplementary Figure 9 (continued)

From Supplementary Figure 4i:

Phosphorylated eIF4E:

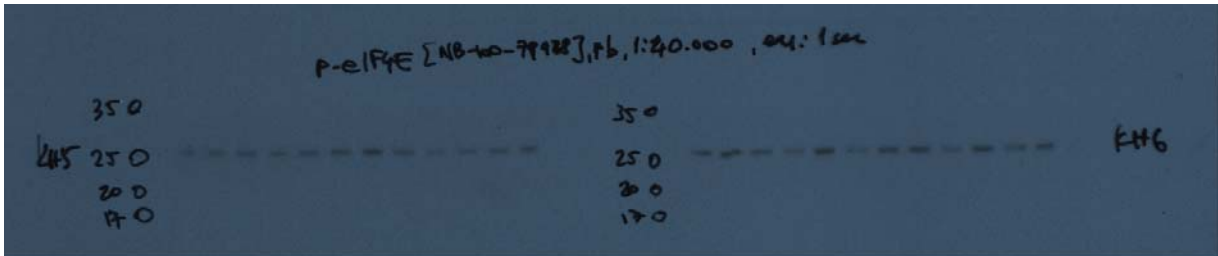

Total eIF4e:

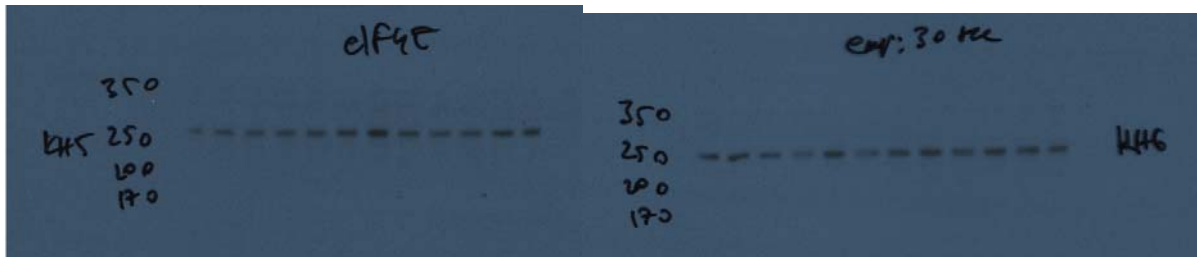

$\beta$ -actin:

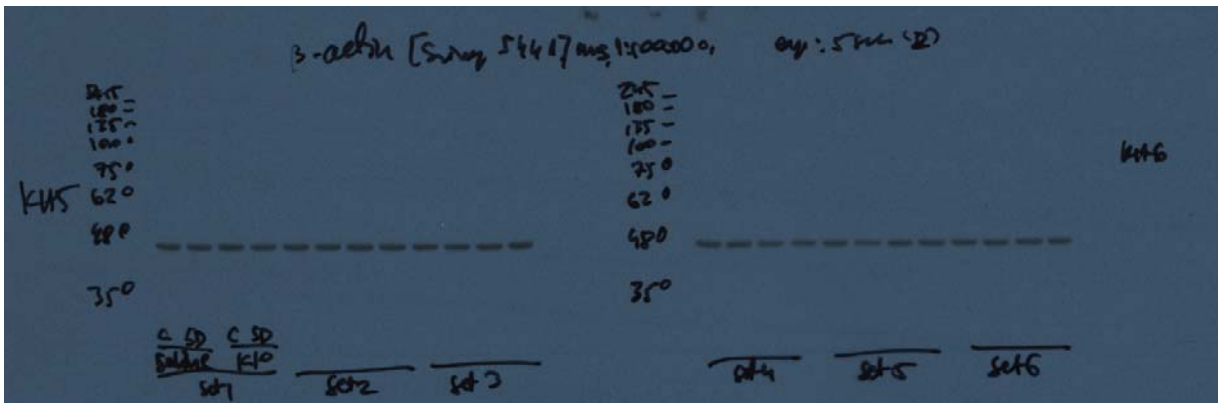

Supplement: 41467_2018_4883_MOESM1_ESM.pdf [file 41467_2018_4883_MOESM1_ESM.pdf]
