# Supplementary material for: Translational control of depression-like behavior via phosphorylation of eukaryotic translation initiation factor 4E
Source: PubMed Central journal article supplement (PMC6018502; doi:10.1038/s41467-018-04883-5), 2018-06-25
Supplement: 41467_2018_4883_MOESM2_ESM.pdf [file 41467_2018_4883_MOESM2_ESM.pdf]

**Editorial Note:** This manuscript has been previously reviewed at another journal that is not operating a transparent peer review scheme. This document only contains reviewer comments and rebuttal letters for versions considered at Nature Communications.

REVIEWERS' COMMENTS:

Reviewer #1 (Remarks to the Author):

The authors have addressed all of my comments. This is a very nice study. One minor quibble. Throughout the text the authors now use the term "depression-like behaviors" which is appropriate. Likewise, the title should be changed to "depression-like behaviors" instead of "depression".

Reviewer #2 (Remarks to the Author):

I am impressed with the additional amount of work performed by the authors. I have no additional comments.

**Reponse to reviewers' comments:**

*Reviewer #1 (Remarks to the Author): The authors have addressed all of my comments. This is a very nice study. One minor quibble. Throughout the text the authors now use the term "depression-like behaviors" which is appropriate. Likewise, the title should be changed to "depression-like behaviors" instead of "depression".*

We thank the reviewer for the encouraging comments. We have modified the title to depression-like behaviours.

*Reviewer #2 (Remarks to the Author): I am impressed with the additional amount of work performed by the authors. I have no additional comments.*

We also thank this reviewer for the her/his positive comment.
